23 **Abstract**

24       Tau aggregates contribute to neurodegenerative diseases including frontotemporal  
25 dementia and Alzheimer's disease (AD). Although RNA promotes tau aggregation *in vitro*,  
26 whether tau aggregates in cells contain RNA is unknown. We demonstrate in cell culture and  
27 mouse brains that both cytosolic and nuclear tau aggregates contain RNA, with enrichment for  
28 snRNAs and snoRNAs. Nuclear tau aggregates colocalize with and alter the composition,  
29 dynamics, and organization of nuclear speckles, which are membraneless organelles involved in  
30 pre-mRNA splicing. Moreover, several nuclear speckle components, including SRRM2,  
31 mislocalize to cytosolic tau aggregates in cells, mouse brains, and patient brains with AD,  
32 frontotemporal dementia (FTD), and corticobasal degeneration (CBD). Consistent with these  
33 alterations we observe the presence of tau aggregates is sufficient to alter pre-mRNA splicing.  
34 This work identifies tau alteration of nuclear speckles as a feature of tau aggregation that may  
35 contribute to the pathology of tau aggregates.

36

## 37 **Introduction**

38 Fibrillar aggregates of the microtubule associated protein tau (tau) are seen in numerous  
39 neurodegenerative diseases collectively referred to as tauopathies (Orr et al., 2017). Tauopathies  
40 have a variety of etiologies ranging from mutations in tau that promote its aggregation, such as in  
41 the inherited frontotemporal dementia with parkinsonism-17 (FTDP-17), to environmental triggers  
42 such as head trauma giving rise to chronic traumatic encephalopathy (CTE), to the incompletely  
43 understood link between beta-amyloid and tauopathy in Alzheimer's disease (AD) (Aoyagi et al.,  
44 2019; Goedert et al., 1988; Wischik et al., 1988).

45  
46 Several lines of evidence suggest that the formation and propagation of tau oligomers or  
47 aggregates is a key driver of toxicity in tauopathies. First, mutations that promote tau aggregation  
48 are causative in FTDP-17 (Goedert and Spillantini, 2000). Second, the rate of cognitive decline in  
49 AD is closely related to the rate of tau aggregate formation (Hanseeuw et al., 2019). Third, tau  
50 aggregates and tauopathy can be transmitted by inoculation in cells and mice (Aoyagi et al., 2019;  
51 Kaufman et al., 2016; Sanders et al., 2014; Woerman et al., 2016). Induction of tau aggregates in  
52 cell models also can be toxic (Sanders et al., 2014). Fourth, reduction of tau is neuroprotective in  
53 mouse models of AD (DeVos et al., 2018). Understanding how tau oligomers or aggregates form  
54 and how they induce neurotoxicity may lead to the development of therapeutics for numerous  
55 neurodegenerative diseases.

56  
57 Tau is present in the human central nervous system as six splice isoforms. These isoforms  
58 differ in the number of N terminal inserts—0N, 1N, or 2N—and the number of microtubule repeat  
59 binding domains (RD)—3R or 4R (Buée et al., 2000; Park et al., 2016). The N terminal inserts

60 have been shown to impact tau's localization, interactions with membranes, spacing between  
61 microtubules, and signal transduction (Brandt et al., 1995; Chen et al., 1992; Lee et al., 1998; Liu  
62 and Götz, 2013). The positively charged RD has been shown to form the core of the amyloid fibrils  
63 present in the brains of patients with tauopathies and this is also where the majority of disease  
64 causing mutations are found (Buée et al., 2000; Falcon et al., 2018, 2019; Fitzpatrick et al., 2017;  
65 Goedert, 2005; Wegmann et al., 2013; Zhang et al., 2020).

66  
67         Several observations suggest RNA may affect the formation of tau aggregates. First, tau  
68 binds RNA (Dinkel et al., 2015; Schröder et al., 1984; Wang et al., 2006; Zhang et al., 2017).  
69 Second, *in vitro* RNA promotes the conversion of soluble tau into insoluble aggregated tau,  
70 possibly because the negatively charged phosphate backbone of RNA can neutralize the positively  
71 charged RD of tau (Ambadipudi et al., 2017; Dinkel et al., 2015; Kampers et al., 1996). Third, tau  
72 immunopurifies with a number of RNA binding proteins in both the aggregated and unaggregated  
73 states (Bai et al., 2013; Broccolini et al., 2000; Gunawardana et al., 2015; Hales et al., 2014a,  
74 2014b; Hsieh et al., 2019; Meier et al., 2016). Fourth, tau aggregates in AD and Pick's disease  
75 have been found to stain positive for RNA using RNA dyes (Ginsberg et al., 1997, 1998). Finally,  
76 analysis of the RNAs interacting with tau in an unaggregated state by iCLIP suggests that tau  
77 preferentially interacts with tRNAs (Zhang et al., 2017). Thus, important questions are whether  
78 pathological tau aggregates contain RNA, and if so, what is the nature of those RNAs and what  
79 are the possible physiologic or pathologic consequences of their interaction?

80  
81         Herein, we investigated the RNA composition of tau aggregates in both cell culture and  
82 mouse model systems. Similar to earlier results, we found that tau aggregates form in the cytosol

83 and the nucleus (Bukar Maina et al., 2016; Gil et al., 2017; Rady et al., 1995; Sanders et al., 2014;  
84 Ulrich et al., 2018). We found that both cytosolic and nuclear tau aggregates contain RNA and are  
85 enriched for RNAs involved in RNA splicing and modification including snRNAs and snoRNAs,  
86 as well as repetitive Alu RNAs. We also found that nuclear tau aggregates contain snRNAs and  
87 are concentrated in, and alter the composition, organization and dynamics of, splicing speckles,  
88 which are non-membranous assemblies of RNA and protein containing nascent RNA transcripts  
89 and splicing machinery (Galganski et al., 2017). Surprisingly, we discovered that the serine  
90 arginine repetitive matrix protein 2 (SRRM2), a protein component of splicing speckles,  
91 mislocalizes from nuclear splicing speckles to cytosolic tau aggregates in cellular models of  
92 tauopathy, tauopathy mouse models, and patients with AD, frontotemporal lobar degeneration  
93 (FTLD), and corticobasal degeneration (CBD). These extensive interactions of tau with splicing  
94 speckles and the splicing machinery correlate with splicing alterations seen in cells that form tau  
95 aggregates. This is notably similar to how cytosolic sequestration of RNA binding proteins such  
96 as TDP-43 and FUS in amyotrophic lateral sclerosis (ALS) can lead to alterations in nuclear RNA  
97 processing promoting neurodegeneration (Lagier-Tourenne et al., 2012; Polymenidou et al., 2011).  
98

## 99 RESULTS

### 100 Cytosolic and nuclear tau aggregates contain RNA

101 To determine whether tau aggregates contain RNA, we employed a previously developed  
102 HEK293 tau biosensor cell line (Holmes et al., 2014; Sanders et al., 2014). The HEK293 biosensor  
103 cells express the 4R repeat domain (RD) of tau with the P301S mutation tagged with either cyan-  
104 fluorescent protein (CFP) or yellow fluorescent protein (YFP). Fluorescent tau aggregates can be  
105 induced in these HEK293 cells via lipofection of preformed non-fluorescent tau aggregates  
106 isolated from the brains of mice expressing 0N4R tau with the P301S mutation (P301S mice,  
107 Tg2541) (Holmes et al., 2014; Sanders et al., 2014). As previously seen (Sanders et al., 2014), we  
108 observed fluorescent tau aggregates in both the cytosol and the nucleus of the HEK293 cells  
109 following transfection of clarified brain homogenate from mice expressing P301S human tau, but  
110 not from mice expressing wild-type (WT) tau (WT mice, Tg21221), which do not develop  
111 tauopathy (Fig. 1A-B). Nuclear tau aggregates are not an artifact of the truncated K18 tau  
112 expressed in HEK293 cells since we also observed the formation of both nuclear and cytosolic tau  
113 aggregates in a tau seeding model expressing full length P301S 0N4R tau-YFP in H4 neuroglioma  
114 cells (Fig. S1A, Supp. video 3). Consistent with these fluorescent bodies being insoluble tau  
115 aggregates, fluorescence recovery after photobleaching (FRAP) revealed that both nuclear and  
116 cytosolic tau aggregates are immobile and do not recover after photobleaching (Fig. S1B, C).

117  
118 Using fluorescence in-situ hybridization (FISH) for poly(A) RNA we observed that  
119 cytosolic and nuclear tau aggregates showed 1.5- and 1.72-fold enrichment of poly(A)<sup>+</sup> RNA  
120 staining, respectively (Figure S1D). We also examined the presence of poly(A) RNA in tau  
121 aggregates in the brains of 6 month old P301S mice, in which transmissible tau aggregates start to

122 form at 1.5 months (Holmes et al., 2014; Yoshiyama et al., 2007). Unlike in humans, where tau  
123 pathology develops in the frontal cortex, tau pathology in P301S mice tau pathology develops  
124 primarily in the hindbrain (Johnson et al., 2017). Nuclear tau and tau aggregates have been  
125 previously observed in the brains of mice and humans, however their function and relevance to  
126 disease is poorly understood (Bukar Maina et al., 2016; Gil et al., 2017; Jiang et al., 2019; Liu and  
127 Götz, 2013; Montalbano et al., 2020; Rady et al., 1995; Ulrich et al., 2018). We observed nuclear  
128 tau aggregates in the hindbrain stain strongly for poly(A) RNA (Fig. 1C, S1E, S7A). We also  
129 observed a redistribution of poly(A) signal to overlap with the cytosolic tau aggregates in P301S  
130 mouse brains (Fig. 1C, S1E, S7A). Thus, in both mouse and cellular models of tau pathologies,  
131 tau forms cytosolic tangles and nuclear puncta that contain RNA.

132

### 133 **Tau aggregates in HEK293 cells and mouse brains are enriched for snRNAs and snoRNAs**

134 To determine the identity of the RNAs present in tau aggregates, we first purified tau  
135 aggregates from HEK293 tau biosensor cells using differential centrifugation and fluorescent  
136 activated particle sorting (FAPS) and then sequenced the associated RNA (Fig. S2A-C). SYTO17  
137 staining of the lysates post-sorting confirmed that RNA remained associated with the tau  
138 aggregates (Fig. S2A). By comparing the abundance of RNAs in total RNA and tau aggregates,  
139 we observed that tau aggregates contain a diverse transcriptome (Fig. 2A) and were enriched for  
140 small non-coding RNAs, particularly snoRNAs and minor snRNAs (Fig. 2B). Some mRNAs were  
141 also enriched in tau aggregates, notably mRNAs coding for voltage gated calcium channel  
142 complex, histone proteins, centrosomal proteins, and proteins involved in splicing regulation (Fig.  
143 S2D-E).

144

145 Analysis of RNAs expressed from multicopy genes using RepEnrich (Criscione et al.,  
146 2014) showed enrichment of RNAs from the multicopy snoRNAs (U3, U17, and U8) and the  
147 multicopy snRNAs (U2 and U1) (Figure S2F-G). Consistent with this observation, U1 snRNA has  
148 previously been observed to be enriched in AD tau aggregates by PCR (Hales et al., 2014a).  
149 Additionally, this analysis showed some enrichment of tRNAs, as previously observed with non-  
150 aggregated tau (Zhang et al., 2017). We also observed enrichment of RNAs from specific types of  
151 transposable elements, namely the hAT-Tip100 family of DNA transposable elements and Alu  
152 elements (Fig. S2F-G).

153

#### 154 **Tau aggregates in P301L mouse brain are also enriched for snRNAs**

155 To investigate whether tau aggregates in mouse brains contain similar RNAs to tau  
156 aggregates identified in HEK293 cells, we fractionated mouse brains with a 1% sarkosyl extraction  
157 followed by tau immunoprecipitation (IP) using the tau-12 antibody to isolate tau aggregates as  
158 previously described (Diner et al., 2017) (Fig. S2H). Western blot analysis showed that the  
159 sarkosyl extraction enriched for insoluble tau in the P301L mice (rTg4510) but not in the WT mice  
160 (rTg21221) (Fig. S2I). To identify RNAs specifically enriched in the aggregated tau fraction, we  
161 compared the enrichment of RNAs in the insoluble tau-12 IP relative to total RNAs between the  
162 WT and P301L mice (Fig. 2C).

163

164 Analysis of RNAs enriched in tau aggregates isolated from mouse brain relative to total  
165 RNA revealed an enrichment of specific RNAs, including snRNAs and snoRNAs in the P301L  
166 tau IP samples (Fig. 2C, D). This is similar to the RNA composition of tau aggregates isolated  
167 from HEK293 cells (Fig S2K). For example, we observed that snoRD115, snoRD104, snoRD70,



168 U2 snRNA, and U6 snRNA, were enriched in the P301L insoluble tau fraction (Fig. 2C). In  
169 contrast to the HEK293 tau aggregates, only particular snoRNAs were enriched. This could be due  
170 to a variety of factors including differences in the isoforms of tau expressed in the two models (RD  
171 of tau in the HEK293 cells versus full-length 0N4R tau in the rTg4510 mice), the mutation in tau  
172 itself (P301S in the HEK293 biosensor cells and P301L in the rTg4510 mice), or differences in  
173 the RNA expression profiles of HEK293 cells and mouse neurons. The sarkosyl-insoluble fraction  
174 from both the P301L and WT mice revealed little to no enrichment of snRNAs or minor snRNAs  
175 suggesting that RNAs enriched in the tau-12 IP are interacting with aggregated tau rather than just  
176 enriched in the insoluble fraction (Fig. S2J). Similar to HEK293 cells, we observed some mRNAs  
177 enriched in tau aggregates from mouse brain (Figure S2L). Interestingly, some of the most  
178 enriched mRNAs are components of the centrosome (PCNT, Cep250, Cep164, Cep131) (Delaval  
179 and Doxsey, 2010; Graser et al., 2007), which is in agreement with previous work that has observed  
180 cytosolic tau aggregates concentrating at the centrosomes (Sanders et al., 2014; Santa-Maria et al.,  
181 2012). mRNAs coding for centrosomal proteins, such as PCNT, have previously been described  
182 to be present at the centrosome where they are locally translated and could become ensnared in tau  
183 aggregates (Sepulveda et al., 2018). Taken together, our results demonstrate that isolated  
184 pathological tau aggregates in mouse brains are enriched for similar types of RNAs as the tau  
185 aggregates in HEK293 cells including snRNAs and snoRNAs.

186

### 187 **Enriched RNAs localize to tau aggregates by fluorescence in-situ hybridization**

188 We used FISH to examine if RNA enriched in tau aggregates identified by RNA  
189 sequencing localized to cytosolic and/or nuclear tau aggregates. We performed FISH for two  
190 enriched snRNAs (U2 and RNU6ATAC), two enriched snoRNAs (snoRA73B and snoRD3A),

191 two depleted mRNAs (CENPQ and NUCKS1), and for the enriched Alu family of multicopy  
192 RNAs (Fig. 3, S3). Interestingly, we observed that enrichment of specific RNAs differed with  
193 respect to the localization of tau aggregates. Specifically, snoRD3A had a 2.05-fold enrichment  
194 into cytosolic tau aggregates relative to bulk cytosol, while nuclear tau aggregates had a 1.35-fold  
195 enrichment of snoRD3A relative to bulk nucleoplasm (Fig. 3A). For U2 snRNA, cytosolic and  
196 nuclear tau aggregates had roughly the same fold enrichment over their respective compartments  
197 (1.48 and 1.42) yet the absolute intensity of U2 snRNA in nuclear tau aggregates was 1.87-fold  
198 higher than that of the cytosolic tau aggregates (Fig. 3B). In cells without tau aggregates, U2  
199 snRNA localizes into discrete nuclear foci called splicing speckles, which are non-membranous  
200 RNA-protein assemblies containing factors involved in mRNA splicing (Kota et al., 2008; Wagner  
201 et al., 2004; Zhang et al., 2016). Nuclear colocalization of the splicing speckle associated snRNAs  
202 with tau implies that nuclear tau aggregation is occurring in splicing speckles (see below).  
203 Consistent with this observation, we also see colocalization of the enriched RNU6ATAC snRNA  
204 in nuclear tau aggregates (Fig. S3A).

205  
206 We also performed FISH for an Alu consensus sequence present in the Alu RNAs enriched  
207 from the sequencing data (Fig. S2F-G) and found that Alu signal enriched into both nuclear and  
208 cytosolic tau aggregates (Fig. S3C). Alu enrichment was greater in cytosolic aggregates (1.56-fold;  
209  $p < 0.0001$ ) than in nuclear aggregates (1.23-fold;  $p = 0.02$ ). In the nuclear aggregates, Alu intensity  
210 was greatest on the periphery of the aggregates. The depleted mRNA NUCKS1 did not show  
211 significant intensity enrichment into either nuclear or cytosolic tau aggregates (Fig. 3C). Similarly,  
212 no positive localization correlation could be found for the depleted mRNA CENPQ and tau (Fig.  
213 S3D). Thus, tau aggregates contain, and are enriched for, a diverse set of specific RNAs.

214

## 215 **Nuclear tau aggregates colocalize with splicing speckles in HEK293 cells**

216 Due to the bias in both the HEK293 and mouse tau aggregate transcriptomes towards  
217 nuclear snRNAs and snoRNAs, we explored whether nuclear tau aggregates localized to the  
218 nucleolus, where snoRNAs are concentrated, or splicing speckles, which are enriched in snRNAs  
219 (Spector and Lamond, 2011).

220

221 Three lines of evidence suggest that nuclear tau aggregates colocalize with splicing  
222 speckles. First, the canonical splicing speckle antibody SC35 localized with nuclear tau aggregates  
223 by immunofluorescence (IF). In IF, the SC35 antibody recognizes the splicing speckle protein,  
224 SRRM2 (Ilik et al., 2020), and in agreement with this specificity, an SRRM2-halo fusion protein  
225 also localizes to nuclear tau aggregates (Fig. 4A, Fig. S4A). Similarly, other components of nuclear  
226 speckles co-localize with nuclear tau aggregates (see below). Second, nuclear tau aggregates are  
227 enriched for poly(A) RNA (Fig. 1C, S1D-E, Supp. Video 1, 2) and splicing speckle associated  
228 RNAs including U2 snRNA (Fig. 3B, S2F) (Huang et al., 1994). Third, consistent with tau  
229 accumulating in splicing speckles and not with other nuclear RNA foci, nuclear tau aggregates do  
230 not colocalize with the nucleolar markers fibrillarin and RPF1 (Kiss, 2002) (Fig. S4B-C). In the  
231 brains of P301S (Tg2541) mice, we also observe pTau(S422) signal colocalizing with both  
232 SRRM2 and poly(A) in the nucleus (Fig. S7A). Thus, nuclear tau aggregates localize to SRRM2-  
233 positive nuclear splicing speckles in cell and mouse models of tauopathy.

234

## 235 **Multiple nuclear speckle components re-localize to cytoplasmic Tau aggregates**

236           While examining the co-localization of tau and SRRM2 in nuclear speckles in HEK293  
237 cells, we observed that 77% of cytosolic tau aggregates also contained SRRM2 that relocated to  
238 the cytosol (Fig 4A & S4D). Similar results were observed with an SRRM2-halo fusion protein  
239 (Fig. S4A). Quantification of SRRM2 IF in cytosolic and nuclear tau aggregates revealed an 11.12-  
240 fold and 2.10-fold enrichment over bulk cytosol and nucleoplasm respectively (Fig. S4E). Both  
241 the colocalization of nuclear tau aggregates in splicing speckles and the relocation of SRRM2  
242 to cytosolic tau aggregates were independent of the lipofectamine used to transfect tau into the cell  
243 models (Fig. S4F).

244  
245           The accumulation of SRRM2 into cytosolic Tau aggregates was sufficient to deplete  
246 nuclear SRRM2 in HEK293, and an H4 neuroglioma cell line expressing a full length 0N4R P301S  
247 tau-YFP that forms fewer nuclear tau aggregates (Fig 4C, 4F). Moreover, we observed SRRM2  
248 relocated into cytoplasmic phospho-tau aggregates in cells without nuclear tau aggregates  
249 demonstrating the cytosolic accumulation is independent of nuclear tau aggregates (Fig. 4D).  
250 Interestingly, in H4 cells that accumulated SRRM2 in cytosolic tau aggregates, nuclear speckles  
251 formed with no change in the intensity of the SON protein, a nuclear speckle protein that does not  
252 accumulate in cytosolic tau aggregates (Fig. S4G-H). These observations argue that cytosolic tau  
253 aggregates deplete the nucleus of SRRM2, but do not prevent the formation of nuclear speckles.

254  
255           To determine if other nuclear speckle proteins also re-localized into cytosolic tau  
256 aggregates to some extent, we utilized IF to measure the average intensity enrichment in nuclear  
257 and cytosolic tau aggregates. We observed that the SRRM2 paralogs, SRRM1 and SRRM3, did  
258 not accumulate in tau aggregates (Fig. 5A, S5A) indicating this accumulation is not shared between

259 SRRM family members. Similarly, proteins with SR domains did not accumulate in cytosolic tau  
260 aggregates (SRSF1, SRSF2, and SRSF3) indicating that an SR domain is not sufficient for  
261 accumulation in cytoplasmic tau aggregates (Fig. 5A, S5A). Some, but not all, speckle  
262 components/splicing factors showed cytosolic tau co-location with PNN (a known binding partner  
263 of SRRM2), SFPQ, MSUT2, DDX39B, and DYRK1A showing the strongest enrichment scores  
264 (Figure 5A, S5A) (Zimowska et al., 2003). Thus, multiple nuclear speckle proteins involved in  
265 pre-mRNA splicing mis-localize to cytosolic tau aggregates with SRRM2, PNN, and SFPQ being  
266 the most strongly re-localized.

267  
268 Since neither SR domains nor the N-terminal conserved features of SRRM proteins  
269 appeared sufficient to recruit proteins to tau aggregates, we hypothesized that the C-terminal  
270 domain of SRRM2, which is comprised of an intrinsically disordered region (IDR) (Fig. S5B),  
271 might be responsible for SRRM2 recruitment to tau aggregates. This would be consistent with the  
272 trend that intrinsically disordered regions of proteins can promote their recruitment to  
273 membraneless organelles. To test this idea, we used the CRISPaint system to create two HEK293  
274 tau biosensor cell lines that contained a halo tag inserted into endogenous SRRM2 (Ilik et al.,  
275 2020; Schmid-Burgk et al., 2016). These two cell lines were 1) a full length SRRM2 cell line  
276 referred to as SRRM2\_FL-halo (insert at aa 2708), and 2) a cell line lacking the C-terminal IDR  
277 of SRRM2 referred to as SRRM2\_dIDR-halo (insert at aa 430) (Fig. 5C, S5B-D). We induced tau  
278 aggregation in these cells and compared the average SRRM2 halo intensity within nuclear and  
279 cytosolic tau aggregates relative to the average intensity in the bulk nucleus or cytosol respectively.  
280

281 We observed that SRRM2\_FL-halo was recruited to tau aggregates, but that the SRRM2\_  
282 dIDR-halo was not (Figures 5C-E). This demonstrated that SRRM2 is recruited to tau aggregates  
283 by the disordered C-terminal domain rather than the structured N-terminal domain. Since the N-  
284 terminal domain of SRRM2 is sufficient for RNA binding and interactions with the core of the  
285 spliceosome (Grainger et al., 2009; Zhang et al., 2018), this result argues that SRRM2 is not  
286 recruited to cytosolic tau aggregates by binding RNA nor the core of the spliceosome.

287

### 288 **Tau aggregates alter the properties of nuclear speckles including pre-mRNA splicing**

289 Since cytoplasmic tau aggregates depleted some nuclear speckle components, and tau  
290 aggregates can also form in nuclear speckles, we hypothesized that tau aggregate formation might  
291 alter the properties and function of nuclear speckles, which we examined in three experiments.  
292 First, given that nuclear speckles are highly dynamic structures (Rino et al., 2007) yet the tau  
293 aggregating in speckles was essentially static (Fig S1C), we examined if speckles with tau  
294 aggregates showed altered dynamics by performing FRAP on two tagged components of speckles,  
295 SRRM2 (Halo) and SRSF2 (mCherry). We observed that in the presence of tau aggregates, both  
296 speckle components showed an increase in the static component, and a reduced rate of recovery  
297 from FRAP (Fig 6A-B). This demonstrates that the presence of Tau aggregates in nuclear speckles  
298 changes their dynamics.

299

300 Second, the formation of tau aggregates in speckles alters the organization of speckle  
301 components. IF for SRRM2 and SON [a speckle protein that does not relocalize to cytosolic tau  
302 aggregates (Fig. 5A)] showed that the two proteins colocalize in speckles in the absence of tau  
303 aggregates. However, in the presence of nuclear tau aggregates, SRRM2 and tau colocalize in the

304 center of speckles, while SON moves to the periphery and forms a ring-like structure around the  
305 aggregate (Fig. 6C). MSUT2, another protein that shows little relocalization to cytosolic tau  
306 aggregates, displayed a similar redistribution from the center of speckles to the periphery in the  
307 presence of tau aggregates. Interestingly, knockdown of MSUT2 has been shown to suppress tau  
308 toxicity in several model systems (Guthrie et al., 2011; Wheeler et al., 2019), suggesting that tau  
309 aggregates disrupt the spatial organization of speckles.

310  
311 Third, since nuclear speckles are thought to modulate pre-mRNA splicing (Spector and  
312 Lamond, 2011), we performed RNA-Seq on the same HEK293 cells with and without tau  
313 aggregates to determine if the presence of tau aggregates could alter splicing. We then investigated  
314 splicing patterns using two analyses: MAJIQ and iREADs (Li et al., 2020; Vaquero-Garcia et al.,  
315 2016). Specifically, we observed using MAJIQ, at a  $\Delta$ PSI threshold of 0.1 and confidence  
316 threshold of 0.95, we identified 305 local splicing variations in 226 genes that are differentially  
317 spliced (Supplemental Table 4). Examination of the types of local splicing variations revealed that  
318 the largest categories were intron retention (42.86%), alternative first exons (15.25%), and  
319 alternative last exons (11.78%) (Fig 6E MAJIQ splicing diagrams and IGV raw read counts for  
320 one example, ATF3, are provided in Fig. S6A-B). Due to the abundance of intron retention events,  
321 we used iREAD (intron REtention Analysis and Detector) to better quantify differential intron  
322 retention between cells with and without tau aggregates. Reads that fully or partially overlap  
323 annotated introns were then used for differential expression analysis using DEseq2 (Li et al., 2020)  
324 (Love et al., 2014). We found that at a  $P_{adj} < 0.05$  there were 1,225 introns in 641 genes that were  
325 retained in cells with tau aggregates and 120 introns in 86 genes that were retained in cells without  
326 tau aggregates (Fig. 6F). Pre-mRNAs with retained introns in cells with tau aggregates cluster in  
327 genes affecting apoptosis and splicing associated protein (ASAP) complex, ribosome, and RNA

328 splicing and processing (Fig. S6C). Thus, the formation of tau aggregates in cells is sufficient to  
329 induce changes in pre-mRNA splicing and is expected to have significant biological impact. Since  
330 patients with tauopathies and model systems with tau mutations show changes in pre-mRNA  
331 splicing patterns in the brain (Apicco et al., 2019; Hsieh et al., 2019; Raj et al., 2018), an alteration  
332 in splicing due to tau aggregate formation may contribute to these splicing changes (see  
333 discussion).

334

### 335 **SRRM2 is depleted from the nucleus and relocalized to cytosolic tau neurofibrillary tangles** 336 **in mouse and human tauopathies**

337 Since SRRM2 was the most highly enriched protein identified, we examined whether  
338 cytosolic tau aggregates also contain SRRM2 in mice via IF, using the SC35 antibody on brains  
339 from WT B6/J mice, or the Tg2541 mice. In B6 control mice, SRRM2 predominantly localized to  
340 poly(A)+ nuclear splicing speckles (Fig. S7A). In contrast, we observe SRRM2 re-localized from  
341 the nucleus into cytosolic phospho-tau aggregates in the P301S-expressing Tg2541 mice (Fig.  
342 S7A). Consistent with these observations, phosphorylated SRRM2 has been previously observed  
343 to be relocalized to the cytosol in 5X FAD mouse brains, however the association of SRRM2 with  
344 tau aggregates was not reported (Tanaka et al., 2018). Thus, SRRM2, and potentially other speckle  
345 components, relocalize and sequestered into cytosolic tau aggregates in both cell culture models  
346 and in tauopathy mice.

347

348 To examine if SRRM2 is mis-localized in human tauopathies, we performed IF on  
349 tauopathy patient brains. We observed that in patients with the primary tauopathy CBD, SRRM2  
350 was present in tau-containing cytosolic aggregates in the form of neuropil threads, whereas



351 SRRM2 localized to nuclear splicing speckles in aged-matched healthy control patients (Figure 7A,  
352 patient demographics in Supplemental Table 3). Quantification of CBD and age matched control  
353 images revealed that the average nuclear SRRM2 signal was significantly lower in the CBD brains  
354 compared to the controls (Fig 7B). We also observed that SRRM2 was re-localized from the  
355 nucleus into the cytosol in the frontal cortex of multiple AD and FTLN patient brains (n=4 AD  
356 and n=4 FTLN), but not age-matched control brains (n=4, Figure 7C, S7B, patient demographics  
357 in Supp. Table 3). These results show that cytosolic SRRM2 marked by the SC35 antibody is a  
358 histopathological feature seen across three distinct human tauopathies.

359

## 360 **DISCUSSION**

361 We present several lines of evidence that both cytosolic and nuclear tau aggregates contain  
362 RNA. First, in mice and HEK293 cells, nuclear and cytosolic tau aggregates both stained positive  
363 for poly(A) RNAs, indicating the presence of mRNAs or non-coding RNAs with poly(A) tails  
364 (Fig. 1, S1D-E, S7A). Second, purification and sequencing of tau aggregates from mouse brains  
365 or HEK293 cells demonstrated the presence and enrichment of specific RNAs, most notably  
366 snRNAs and snoRNAs (Fig. 2). Third, FISH for specific RNAs in HEK293 cells validated that our  
367 sequencing identified RNAs enriched in tau aggregates (Fig. 3). Although we have not yet  
368 examined the specific RNAs present in tau aggregates in human pathologies, tau aggregates in  
369 patient brains stain positive with acridine orange, a dye with specificity for RNA (Ginsberg et al.,  
370 1997, 1998). Based on these observations, we suggest that tau aggregates generally contain RNA,  
371 and the presence of specific RNA species may alter their formation and stability. The presence of  
372 RNA in tau aggregates may explain why tau aggregates and other RNA binding proteins can co-

373 immunoprecipitate and/or co-localize (Apicco et al., 2018; Gunawardana et al., 2015; Hales et al.,  
374 2014a, 2014b; Maziuk et al., 2018; Meier et al., 2016; Vanderweyde et al., 2016).

375  
376 We observed that tau aggregates are enriched for a number of different RNA species. Most  
377 notably, we observed enrichment of specific snRNA and snoRNAs in both HEK293 reporter cells  
378 and in mouse brains, although the specific snRNA/snoRNA species can vary between model  
379 systems (Fig. 2). We also observed the enrichment of repetitive RNAs (such as tRNAs, Alu  
380 elements, and satellite RNAs) and some mRNAs coding for proteins in the centrosome and  
381 spliceosome (Fig. S2D-L). As our library preparation protocol was not specifically designed to  
382 capture tRNAs, miRNAs, or rRNAs, our analyses may underestimate the abundance of these  
383 species (Motameny et al., 2010; Xu et al., 2019). The mechanisms by which specific RNAs are  
384 enriched in tau aggregates remains to be determined but could be due to tau's intrinsic RNA  
385 binding specificity, the structure of the tau conformers, and/or the presence of specific RNAs at  
386 sites of tau aggregation such as snRNAs in nuclear speckles or mRNAs at the centrosome  
387 (Sepulveda et al., 2018). We suggest tau aggregates in cells could be considered a representative  
388 of the growing class of RNA and protein assemblies.

389  
390 We provide evidence that nuclear tau aggregates form in splicing speckles and alter their  
391 properties, composition, and function. One critical observation is that nuclear tau assemblies are  
392 observed both in HEK293 cells and P301L mice that overlap with both protein and RNA markers  
393 of nuclear speckles (Fig. 4, S4, S7). Moreover, nuclear speckles that contain tau aggregates show  
394 altered dynamics of both SRRM2 and SRSF2 (Fig. 6A) demonstrating tau aggregation has altered  
395 their material properties. Moreover, tau accumulation in speckles also changes their organization

396 with proteins partitioning into novel sub-domains of the assembly (Fig. 6C-D). Finally, since  
397 cytoplasmic tau aggregates accumulate multiple components of nuclear speckles, leading to their  
398 depletion from the nucleus, the presence of tau aggregates within cells alters the composition of  
399 nuclear speckles.

400

401 A critical question is the biological significance of the nuclear tau aggregates. In this light  
402 it is important to note we observed tau aggregates in both cell and mouse models of tauopathies  
403 demonstrating nuclear tau aggregates are not an artifact of cell line models (Fig. 1C, S1E, S7A).  
404 Moreover, we observe tau aggregates in nuclear speckles in both HEK293 cells expressing just the  
405 4 repeat regions of tau, and in H4 neuroglioma cells expressing a full-length tau isoform (Fig.  
406 S1A) demonstrating tau accumulating in speckles is not an artifact of expressing truncated tau.  
407 Although tau is predominantly thought to be a cytosolic microtubule associated protein, numerous  
408 labs have observed aggregated and unaggregated tau in the nucleus of neuronal and non-neuronal  
409 cells (Bukar Maina et al., 2016; Gärtner et al., 1998; Gil et al., 2017; Jiang et al., 2019; Liu and  
410 Götz, 2013; Maj et al., 2010; Montalbano et al., 2020; Rady et al., 1995; Siano et al., 2019; Ulrich  
411 et al., 2018; Violet et al., 2014, 2015). Indeed, previous studies in HEK293 cells found that  
412 transfection of tau conformers that produced nuclear tau aggregates with a “speckled” phenotype  
413 were associated with greater cellular toxicity relative to those that only produced cytosolic tau  
414 aggregates (Sanders et al., 2014). In agreement, the suppressor of tau toxicity, MSUT2 (Guthrie et  
415 al., 2011; Wheeler et al., 2019), also localized to nuclear splicing speckles (Fig. 6D, S5A). Thus,  
416 tau’s interaction with splicing speckle components could be integral to the toxicity of tau  
417 aggregation.

418

419           A striking feature of our results is that cytoplasmic tau aggregates accumulate and mis-  
420 localize several proteins that normally accumulate in nuclear speckles (Fig. 4-6, S4-S7). The most  
421 striking of these is the SRRM2 protein, which can show an order of magnitude enrichment in  
422 cytosolic tau aggregates as compared to the bulk cytosol (Fig. 5A, S4E). Moreover, we also  
423 observed accumulation of SRRM2 in tau aggregates in mice, and in the human tauopathy, CBD  
424 (Figure 7A). Strikingly, we observed cytosolic mis-localization and/or nuclear depletion of  
425 SRRM2 in multiple tauopathies, including AD and FTLD (Fig. 7C, S7B). The consistent mis-  
426 localization of SRRM2 in cell line and animal models of tauopathy, as well as in deceased patient  
427 brain samples, argues the mis-localization of nuclear speckle proteins into cytosolic tau aggregates  
428 is a fundamental and consistent consequence of tau aggregation. An important issue in future work  
429 is to determine the mechanism of nuclear speckle component mis-localization and its biological  
430 consequences.

431

432           One likely consequence of altering the composition and dynamics of nuclear speckles  
433 would be to alter pre-mRNA splicing. It is well documented that pre-mRNA splicing is altered in  
434 tauopathy patient brains, including AD patients (Hsieh et al., 2019; Raj et al., 2018). Consistent  
435 with this finding, we demonstrate that the formation of tau aggregates in HEK293 cells is sufficient  
436 to induce alterations in alternative splicing and increase the number of significantly retained  
437 introns (Fig. 6E, S6). Thus, tau aggregates are sufficient to alter pre-mRNA splicing, although it  
438 should be noted that splicing alterations seen in disease tissue may be complicated by additional  
439 factors including multiple cell types and neuroinflammatory responses. Interestingly, many of  
440 these retained introns triggered by tau aggregates are in RNAs that code for proteins involved in  
441 RNA processing and ribosome biogenesis (Fig. S6A). Disruptions to these processes could lead to

442 a pathologic cascade, potentially explaining the complex alterations in ribosome function and RNA  
443 processing that have been observed in AD patients (Hsieh et al., 2019; Q et al., 2005; Raj et al.,  
444 2018). These results raise the possibility that tau aggregation per se is responsible for some of the  
445 splicing changes seen in disease tissue.

446

447         The coaggregation of RNA and proteins in tauopathies is reminiscent of pathologic RNA-  
448 protein aggregates seen in other neurodegenerative and neuromuscular diseases, such as  
449 amyotrophic lateral sclerosis and inclusion body myopathy (Ramaswami et al., 2013; Taylor et al.,  
450 2016). Thus, the sequestration of RNAs and RNA binding proteins into pathologic aggregates may  
451 represent a shared pathophysiological feature across multiple degenerative diseases affecting  
452 diverse tissue types with a common feature being depletion of critical RNA processing factors  
453 from the nucleus leading to changes in RNA processing and gene expression.

454

455 **FIGURE LEGENDS:**

456 **Figure 1: Tau biosensor cell schematic and tau aggregates in mice contain poly(A) RNA.**

457 Tau aggregates in HEK293 biosensor cells and mouse brain contain poly(A) RNA. **(A)**  
458 Schematic showing experimental design of tau seeding in HEK293 biosensor cells. Brain  
459 homogenate from mice expressing either WT (rTg21221) or P301S (rTg2541) 0N4R tau was  
460 homogenized, clarified by successive centrifugation and transfected into HEK293 cells  
461 expressing tau K18 (4R repeat domain) tagged with either CFP or YFP. Only cells transfected  
462 with P301S homogenate formed bright fluorescent aggregates. **(B)** Tau aggregates form in both  
463 the nucleus and the cytosol following transfection of P301S tau homogenate. **(C)** Cytosolic and  
464 nuclear tau aggregates contain poly(A) RNA in mouse brain. White pixels in Coloc image show  
465 pixels above the Costes determined thresholds in 2D intensity plots (PCC = Pearson correlation  
466 coefficient and tM1= thresholded manders colocalization (% of tau pixels above threshold that  
467 colocalize with poly(A) pixels above threshold)). X-axis rotation shows AT8 and oligo(dT)  
468 staining within the nucleus of mouse Tg2541 cells.

469

470 **Figure 2: The RNA composition of tau aggregates in cellular and mouse tauopathy model**

471 **systems.** The RNA composition of tau aggregates in cellular and mouse tauopathy model  
472 systems. **(A)** Scatter plot of RNA sequencing showing average FPKM of two replicates for tau  
473 aggregate associated RNA and total RNA. Genes in red are two-fold enriched in tau aggregates  
474 and genes in blue are two-fold depleted from tau aggregates. Genes with fewer than 5 FPKM  
475 were removed from the analysis due to low coverage. **(B)** Fold change in the percentage of total  
476 FPKM for each gene type between the tau aggregate RNA and total RNA. Percentage of total  
477 FPKM was calculated by grouping genes using the Ensembl GRCh38.p13 biomart gene types.

478 (C) Scatter plot of RNA sequencing data from mouse brain tau aggregate isolation in P301L and  
479 WT mice. Enrichment scores were calculated by dividing the insoluble tau IP FPKM by the total  
480 RNA FPKM for each replicate. Genes in red are two-fold enriched and genes in blue are two-  
481 fold depleted from the P301L sarkosyl insoluble tau aggregates. (D) Gene type enrichment in the  
482 P301L and WT samples. Fold change for each gene type was calculated by dividing the  
483 percentage of total FPKM made up by each gene type in the insoluble tau-IP by the percentage  
484 of total FPKM made up by each gene type in the total RNA. The numbers below the gene type  
485 names indicate the P301L/WT enrichment.

486  
487 **Figure 3: FISH for RNAs in HEK293 tau biosensor cells identified by sequencing.** Line  
488 intensity plots and intensity quantification show enrichment of snoRD3A (A) and U2 snRNA (B)  
489 in both the nucleus and cytosol. We observed no enrichment of the depleted mRNA, NUCKS1  
490 (C), into nuclear or cytosolic tau aggregates. Bar graphs show quantification of FISH  
491 fluorescence intensity within nuclear and cytosolic tau aggregates in relation to bulk cytosol and  
492 nucleoplasm (n = 20 aggregates). Significance was determined using an unpaired two-tailed t-  
493 test. White pixels in Coloc image show pixels above the Costes determined thresholds in 2D  
494 intensity plots (PCC = Pearson correlation coefficient and tM1= thresholded manders  
495 colocalization (% of tau pixels above threshold that colocalize with red pixels above threshold)).  
496

497 **Figure 4: Tau aggregates colocalize with splicing speckles and mislocalize SRRM2 in**  
498 **tauopathy model systems.** (A) Nuclear tau aggregates in HEK293 cells colocalize with SRRM2  
499 (SC-35 antibody), a marker of splicing speckles. (B) Colocalization analysis showing the  
500 relationship between various tau aggregates and SRRM2 1) nuclear tau aggregates and splicing

501 speckles marked by SRRM2, **2**) a cytosolic tau aggregates that colocalize with cytosolic  
502 SRRM2, and **3**) a cytosolic tau aggregate that does not colocalize with SRRM2. **(C)**  
503 Quantification of the percent of total SRRM2 intensity in the nucleus in HEK293 cells with and  
504 without tau aggregates (n = 23 cells). **(D)** Immunofluorescence of phospho-tau (Thr205) and  
505 SRRM2 in H4 neuronal cells expressing 0N4R\*P301S-YFP tau +/- tau aggregates shows  
506 SRRM2 recruitment to tau aggregates is not dependent on phosphorylation at Thr205. **(E)** 2D  
507 intensity plot for the zoomed images showing two Thr205 positive tau aggregates, one that  
508 colocalizes with SRRM2 and one that does not colocalize with SRRM2. White pixels in Coloc  
509 image show pixels above the Costes determined thresholds in 2D intensity plot. **(F)**  
510 Quantification of percentage of SRRM2 in the nucleus in cells with and without tau aggregates  
511 (n = 25 cells). Images were quantified using CellProfiler and P-values were calculated using an  
512 unpaired two tailed t-test.

513

514 **Figure 5: Other proteins that localize to tau aggregates and the C-terminal region of**  
515 **SRRM2 is responsible for localization to tau aggregates. (A, B)** Cytosolic and Nuclear tau  
516 aggregates enrichment scores (Median intensity within tau aggregate/median intensity within  
517 cytosol or nucleus) for 20 proteins. Ilastik was used to segment images into the following  
518 categories: tau aggregates, nucleus, cytosol, and background. Segmentation masks were fed into  
519 CellProfiler to quantify the median intensity of the interrogated protein. N=25 images per  
520 condition, scale bar represents 95% confidence interval. **(C)** Images of cells CRISPR edited to  
521 express endogenous FL or dIDR SRRM2 tagged with halo. **(D)** schematic of SRRM2 constructs.  
522 **(E, F)** Cytosolic and nuclear enrichment scores for FL-Halo, dIDR-Halo, and unedited SRRM2.

523



524

525 **Figure 6: Tau aggregation alters dynamics and organization of splicing speckles and RNA**

526 **splicing. (A)** FRAP of SRRM2\_FL-halo and **(B)** SRSF2-mCherry splicing speckles with and  
527 without tau aggregates (n=5). 405 nm laser was used to photobleach and fluorescence intensity  
528 was measured using the 647 nm channel for halo-JF647 and 561 nm for mCherry. **(C, D)** Images  
529 of P301S tau transfected cells showing nuclear speckle reorganization in the presence of  
530 aggregates. SON and MSUT2 move to the periphery of speckles, while SRRM2 remains in the  
531 center of speckles with the tau aggregate. **(E)** MAJIQ Analysis of splicing changes in cells with  
532 and without tau aggregates showing that most splicing changes are intron retention events. **(F)**  
533 Volcano plot showing differential intron retention in cells with tau aggregates quantified by  
534 iREAD and DEseq2 (Red =  $P_{adj} < 0.05$ ). Multiple points per gene are due to the multiple  
535 retained introns in those genes.

536

537 **Figure 7: SRRM2 is relocalized to cytosolic tau aggregates in human tauopathies (A)** IF

538 and colocalization analysis showing hyperphosphorylated tau (pTau-Thr205) colocalizes with  
539 SRRM2 (SC35) in the cytosol of CBD patient brain while SRRM2 is localized to the nucleus in  
540 age matched control brain. **(B)** Quantification of the average nuclear SRRM2 intensity showing a  
541 significant decrease in the setting of CBD relative to age matched control. Error bars are 95%  
542 confidence interval and p-values were calculated using an unpaired two tailed t-test.

543 Immunohistochemistry of SRRM2 in human brains showing SRRM2 redistribution to the cytosol  
544 in AD and FTD brains but retains nuclear localization in control brains. Patient demographics  
545 and additional examples can be found in Fig. S5D Table S3.

546

547

## 548 SUPPLEMENTAL FIGURE LEGENDS

549 **Supplemental Movies 1, 2, 3:** 3D rotation of a HEK293 cell nucleus expressing K18-YFP tau  
550 **(1)** and a mouse brain nucleus **(2)** showing intranuclear tau aggregates (green) (YFP tagged tau  
551 in HEK293 cells, and AT8 IF in mouse brain) that colocalize with poly(A) signal (red) in  
552 splicing speckles. **(3)** 3D rotation of an H4 cells expressing 0N4R tau-YFP showing intranuclear  
553 tau aggregates.

554

555

556 **Supplemental figure 1: FRAP of nuclear and cytosolic tau aggregates in HEK293 tau**  
557 **biosensor cells and additional examples of tau aggregates containing poly(A) RNA. (A)** H4  
558 neuroglioma cells expressing 0N4R tau-YFP that contain nuclear tau aggregates. **(B, C)** FRAP of  
559 nuclear and cytosolic tau aggregates in HEK293 cells. 405 nm laser was used to photobleach and  
560 fluorescence intensity was measured in the 488nm channel (n=5). Arrow in example images  
561 shows bleached area. **(D)** FISH for Poly(A) RNA in HEK293 cell nuclear and cytosolic tau  
562 aggregates. Bar graphs show quantification of poly(A) RNA fluorescence intensity within  
563 nuclear and cytosolic tau aggregates in relation to bulk cytosol and nucleoplasm (n = 35  
564 aggregates). White pixels in Coloc image show pixels above the Costes determined thresholds in  
565 2D intensity plots (PCC = Pearson correlation coefficient and tM1= thresholded manders  
566 colocalization (% of tau pixels above threshold that colocalize with poly(A) pixels above  
567 threshold)). Error bars represent 95% confidence intervals and significance was determined using  
568 an unpaired two-tailed t-test. **(E)** Additional examples from B6 non transgenic and P301S mice

569 (Tg2541) showing cytosolic tau aggregates (Ex. 1) and nuclear tau aggregates (Ex. 2, 3) contain  
570 RNA.

571

572 **Supplemental figure 2: Additional data on HEK293 and mouse brain tau aggregate**

573 **isolation. (A)** Schematic showing isolation of HEK293 tau aggregates. HEK293 cells transfected  
574 with either WT or P301S mouse brain homogenate were lysed, and the cell lysate was stained  
575 with the RNA dye, SYTO17, showing the presence of RNA. The cell lysate was then run  
576 through a fluorescence activated particle sorter and gates were set to sort fluorescent particles in  
577 the P301S but not WT sample. Sorted fractions were examined by fluorescence microscopy to  
578 ensure particles were sorted. **(B)** Agilent TapeStation traces and QuBit readings of RNA isolated  
579 from sorted tau aggregates. **(C)** Flowcytometry scatter plots showing fluorescence and side  
580 scatter of particles for each replicate from the WT and P301S cell lysate (left column). The  
581 sorted and waste fractions were then re-run through the flow cytometer to ensure the particles  
582 were being sorted (right column). **(D)** Analysis of mRNAs two-fold enriched in tau aggregates  
583 from HEK293 cells. Genes from the following groups were highlighted: Voltage-gated calcium  
584 channel proteins, histone proteins, centrosomal proteins, and splicing related proteins. **(E)**  
585 Cellular component gene ontology of the mRNAs that are two-fold enriched in tau aggregates.  
586 **(F, G)** Analysis of multicopy gene families using RepEnrich showing enrichment of specific  
587 snoRNA repeats (U8, U17, and U3), snRNA repeats (U1 and U2), tRNA species, and Alu  
588 elements. The gene family color scheme is shared between F and G. **(H)** Schematic of tau  
589 aggregate isolation from mouse brain. Fractions that were taken for RNA isolation and  
590 sequencing are highlighted in Red. **(I)** Western blot of fractions from tau aggregate isolation  
591 showing P2 fraction (sarkosyl insoluble fraction) enriches for insoluble tau that is present in the

592 P301L mice and not the WT mice. **(J)** Gene type enrichment in the P301L and WT sarkosyl  
593 insoluble samples. Fold change for each gene type was calculated by dividing the percentage of  
594 total FPKM made up by each gene type in the sarkosyl insoluble fraction (P2) by the percentage  
595 of total FPKM made up by each gene type in the total RNA. The numbers below the gene type  
596 names indicate the P301L/WT enrichment. Note the absence of snRNA enrichment in the  
597 sarkosyl insoluble fraction. **(K)** Mouse vs HEK293 gene type enrichment. **(L)** Scatter plot of  
598 mRNA enrichment in mouse brain tau aggregates in P301L and WT mice. Enrichment scores  
599 were calculated by dividing the insoluble tau IP FPKM by the total RNA FPKM for each  
600 replicate. mRNAs in red are two-fold enriched and mRNAs in blue are two-fold depleted from  
601 the P301L sarkosyl insoluble tau IP. Genes with fewer than 5 FPKM were removed from  
602 analysis due to low coverage. Two groups of mRNAs were highlighted: centrosomal proteins  
603 and splicing related mRNAs.

604

605 **Supplemental figure 3: Additional FISH for RNAs in HEK293 tau biosensor cells. (A, B)**

606 FISH of the enriched RNU6ATAC and snoRA73B shows overlapping fluorescence intensity in  
607 nuclear tau aggregates. **(C)** FISH for enriched multicopy Alu RNAs. Quantification shows  
608 enrichment in to nuclear and cytosolic tau aggregates, with greater enrichment into cytosolic tau  
609 aggregates relative to nuclear aggregates. Bar graphs show quantification of FISH fluorescence  
610 intensity within nuclear and cytosolic tau aggregates in relation to bulk cytosol and nucleoplasm  
611 ( $n = 20$  aggregates). Significance was determined using an unpaired two-tailed t-test. White  
612 pixels in Coloc images show pixels above the Costes determined thresholds in 2D intensity plots  
613 (PCC = Pearson correlation coefficient and tM1= thresholded manders colocalization (% of tau

614 pixels above threshold that colocalize with Alu FISH pixels above threshold)). **(D)** FISH for the  
615 depleted mRNA, CENPQ, reveals lack of enrichment in nuclear and cytosolic tau aggregates.

616

617

618 **Supplemental figure 4: Additional HEK293 tau biosensor cell data supplementing figure 5.**

619 **(A)** Images of HEK293 biosensor cells expressing SRRM2\_FL-halo showing colocalization  
620 between nuclear and cytosolic tau aggregates. White pixels in Coloc images show pixels above  
621 the Costes determined thresholds in 2D intensity plots (PCC = Pearson correlation coefficient  
622 and tM1= thresholded manders colocalization (% of tau pixels above threshold that colocalize  
623 with SRRM2\_FL-halo pixels above threshold)). **(B, C)** IF for two nucleolar proteins, Fibrillarin  
624 and RPF1, showing lack of colocalization between tau aggregates and the nucleolus. Costes  
625 method was unable to identify a positive correlation to determine thresholds. **(D)** Analysis of the  
626 % of cytosolic tau aggregates that colocalize with SRRM2 in HEK293 tau biosensor cells. 165  
627 cells in 5 images were scored by hand as either colocalized or not colocalized. **(E)** Analysis of  
628 SRRM2 fluorescence intensity within cytosolic and nuclear tau aggregates relative to bulk  
629 cytosol and nucleoplasm (n = 20 measurements). Significance was determined using an unpaired  
630 two-tailed t-test. **(F)** Tau aggregates form in both the nucleus and the cytosol with and without  
631 lipofectamine 2000 as a transfection reagent showing that SRRM2 mislocalization to cytosolic  
632 tau aggregates is not dependent on lipofectamine. **(G, H)** Analysis of whether SRRM2  
633 mislocalization disrupts the formation of SON positive splicing speckles. Cells outlined in white  
634 are cells that have SRRM2 mislocalized to the cytosol and by visual inspection and  
635 quantification of the average SON intensity, have no change in splicing speckles due to the  
636 mislocalization of SRRM2. Error bare represent 95% confidence intervals.

637

638 **Supplemental Figure 5: Additional data to support Fig. 5. (A)** Images of proteins examined  
639 for their association with tau aggregates in Fig 5 A, B. **(B)** Disorder prediction of SRRM2 by  
640 IUPred2 showing the relative ordered nature of the N-terminus and the disorder of the C-  
641 terminus. The cwf21 domain and the location of the SRRM2\_dIDR-halo truncation are shown.  
642 **(C, D)** Schematic of the halo tagged SRRM2 fusion proteins made using CRISPaint and gel  
643 showing JF647 conjugated to halo fusion constructs running at the appropriate sizes

644

645 **Supplemental Figure 6: Additional splicing analysis data from cells with and without tau**  
646 **aggregates. (A)** Example of intron retention between exon 8 and 9 in ATF3 identified by  
647 MAJIQ at  $\Delta$ PSI threshold of 0.1 and confidence threshold of 0.95. **(B)** Integrated genome  
648 viewer image showing raw read counts for each sequencing replicate. Intron retention can be  
649 seen between exon 8 and 9. **(C)** Gene ontology of the genes containing significantly retained  
650 introns in cells with tau aggregates (FDR < 0.05).

651

652 **Supplemental figure 7: Additional *in vivo* data from mouse and human tauopathies. (A)** IF  
653 and FISH showing p-tau (S422) positive tau aggregates colocalized with SRRM2 (SC-35) and  
654 poly(A) RNA in the nucleus of Tg2541 mouse hindbrain. White pixels in Coloc images show  
655 pixels above the Costes determined thresholds in 2D intensity plots (PCC = Pearson correlation  
656 coefficient and tM1= thresholded manders colocalization (% of tau pixels above threshold that  
657 colocalize with red pixels above threshold)). Y-axis rotation shows that the pTau(S422) foci  
658 being interrogated in the zoomed images are within the nucleus rather than above or below the  
659 nucleus. **(B)** IHC in human brain showing cytosolic inclusions of SRRM2 in AD and FTL D

660 patient brains, but not in control brains. (Patient demographics for this figure and Figure 6B can  
661 be viewed in Supplemental Table 3).

662

663

664

665

## 666 **METHODS**

### 667 **Tauopathy mouse models**

668           Animals were maintained in a facility accredited by the Association for Assessment and  
669 Accreditation of Laboratory Animal Care in accord with the Guide for the Care and Use of  
670 Laboratory Animals. All procedures were approved by the University of California, San  
671 Francisco, Institutional Animal Care and Use Committee. Animals were maintained under  
672 standard environmental conditions, with a cycle of 12 hours light and 12 hours dark and free  
673 access to food and water.

674           For tau seeding experiments in HEK293 tau biosensor cells, the following mice were  
675 used: homozygous B6-Tg(Thy1-MAPT\*P301S)2541 mice (referred to as Tg2541 or P301S tau  
676 mice in cellular seeding experiments) and FvBB6F1-Tg(Camk2a-tTa),(tetO-MAPT\*wt)21221  
677 (referred to as rTg21221 or WT tau mice in cellular seeding experiments). Mice were euthanized  
678 when the P301S tau mice developed spontaneous pathology (6-7 months). Collected brains were  
679 homogenized to 10% (wt/vol) in DPBS, aliquoted, and frozen at -80°C.

680           For tau isolation and sequencing of tau aggregates, the following mice were used:  
681 FvBB6F1-Tg(Camk2a-tTA)1Mmay, (tet)-tdTomato-Syp/EGFP)1.1Luo/J,(tetO-  
682 MAPT\*P301L)4510 (referred to as rTg4510 or P301L mice in sequencing experiments) and  
683 FvBB6F1-Tg(Camk2a-tTa),(tetO-MAPT\*wt)21221 (referred to as rTg21221 or WT tau mice in  
684 sequencing experiments).



685 For IF and FISH experiments, the following mice were used: homozygous B6-Tg(Thy1-  
686 MAPT\*P301S)2541 mice (referred to as Tg2541 or P301S tau mice in IF and FISH experiments)  
687 and C57BL/B6 non transgenic mice (referred to as WT in IF and FISH experiments) were used  
688 as a control.

689

#### 690 **Clarification of brain homogenate for tau aggregate seeding in HEK293 cells**

691 10% brain homogenate from Tg2541 or WT mice was centrifuged at 500 x g for 5  
692 minutes, the supernatant was transferred to a new tube and centrifuged again at 1,000 x g for 5  
693 minutes. The supernatant was again transferred to a new tube and the protein concentration was  
694 measured using bicinchoninic acid assay (BCA), and diluted in DPBS to 1 mg/mL for  
695 transfection into HEK293 tau biosensor cells.

696

#### 697 **PTA precipitation from brain homogenate for tau aggregate seeding in H4 biosensor cells**

698 PTA precipitation of tau aggregates from mouse brain was performed as described  
699 (Woerman *et al*, 2016). 10% brain homogenate was incubated in final concentrations of 2%  
700 sarkosyl (Sigma, 61747) and 0.5% benzonase (Sigma, E1014-25KU) with constant agitation at  
701 37°C for 2 hours. Sodium PTA (Sigma, P6395) was made in ultrapure MilliQ H<sub>2</sub>O and the pH  
702 was adjusted to 7.0. PTA was added to the samples to a final concentration of 2%, and samples  
703 were then incubated shaking at 37°C overnight. The samples were centrifuged at 13,200 × g at  
704 room temperature for 30 minutes, and the supernatant was removed. The resulting pellet was  
705 resuspended in 2% sarkosyl/PBS and 2% PTA. The sample was again incubated shaking at 37°C  
706 for 2 hours before a second centrifugation as above. The supernatant was again removed, and the  
707 pellet was resuspended in 1X PBS to 10% of the initial starting volume. This suspension was

708 incubated using 1 $\mu$ L/well with Lipofectamine 2000 and OptiMEM at room temperature for at  
709 least 1.5 hours prior to infecting cells.

710

#### 711 **Cell culture and tau seeding of H4 biosensor cells**

712 H4 cells (ATCC, HTB-148) stably expressing the *pIRESpuro3* vector (Clontech)  
713 containing a codon-optimized 0N4R MAPT gene with the P301S point mutation and tagged with  
714 YFP were cultured in Dulbecco's Modified Eagle's Medium (DMEM) supplemented with 10%  
715 fetal bovine serum (FBS) and 0.2% penicillin-streptomycin, and maintained in incubators set to  
716 37°C with 5% carbon dioxide. Cells were plated in a 12-well glass-bottomed dish at 1x10<sup>5</sup>  
717 cells/well and allowed to settle for a minimum of 2 hours prior to infection with PTA-  
718 precipitated tau prions from Tg2541 mouse brain.

719

#### 720 **Cell culture and tau seeding in HEK293 biosensor cells**

721 HEK293 biosensor cells stably expressing the 4R RD of tau with the P301S mutation  
722 were purchased from ATCC (CRL-3275) (previously described in (Holmes et al., 2014)). Cells  
723 were seeded at 2.5 x 10<sup>5</sup> cells/mL in 500 $\mu$ L of DMEM with 10% FBS and 0.2% penicillin-  
724 streptomycin antibiotics on PDL coated glass coverslips in a 24-well tissue culture treated plate  
725 (Corning 3526) and allowed to grow overnight in incubators set to 37°C with 5% carbon dioxide.  
726 The next day, 7 $\mu$ g of 1 mg/mL clarified P301L tau or WT tau mouse brain homogenate was  
727 mixed with 6 $\mu$ L of Lipofectamine 2000 and brought up to 100 $\mu$ L in PBS and allowed to sit at  
728 room temperature for 1.5 hours. The mixture was then added to 300 $\mu$ L of DMEM without FBS  
729 or antibiotics and mixed by pipetting. 50 $\mu$ L of this mixture was added to each well of a 24 well  
730 plate and allowed to incubate at 37 °C for 24 hours. Tau aggregate formation was monitored  
731 using a fluorescence microscope with a 488nm filter.

732

### 733 **Generation of Lentiviral particles**

734 As previously described (Burke et al., 2019), HEK293T cells (T25 Flask at 80%  
735 confluence) were co-transfected with 1ug of pLenti-SRSF2-mCherry-blasticidin, 1ug of pVSV-  
736 G, 1ug of pRSV-Rev, and 1ug of pMDLg-pRRe using 16uL of lipofectamine 2000. Medium was  
737 replaced 6 hours post-transfection. Medium was then collected at 24- and 48-hours post-  
738 transfection and filter sterilized with a 0.45-um filter.

739

### 740 **Generating SRSF2-mCherry cells via lenti-virus**

741 HEK293 biosensor cells were seeded in a T-25 flask. When 80% confluent, the cells were  
742 incubated for 1 hour with 1mL of SRSF2-mCherry-blasticidin lentiviral particles containing 10-  
743 ug of polybrene with periodic rocking. 4mL of normal medium was then added to the flask and  
744 incubated for 24 hours. Normal medium was then aspirated and replaced with selective medium  
745 containing 10-ug/mL of Blasticidine S hydrochloride (Sigma-Aldrich). Selective medium was  
746 changed every three days. After one-week, selective medium was replaced with normal growth  
747 medium. Expression of SRSF2-mCherry was confirmed by fluorescence microscopy.

748

### 749 **Generating halo tagged SRRM2 cells using CRISPaint**

750 HEK293 biosensor cells were seeded in a 6 well plate. As previously described (Ilik et  
751 al., 2020; Schmid-Burgk et al., 2016) when 80% confluent, cells were transfected with 1 ug of  
752 pCRIPaint-HaloTag-PuroR plasmid, 0.5 ug of PX458-CAS9 targeting plasmid, 0.5 ug of of  
753 pCAS9-mCherry-Frame\_selector plasmid. After 24 hours, cells were selected using 2 ug/mL

754 puromycin for 48 hours to enrich for edited cells. To label the halo constructs, JF646 was added  
755 to growth media at 10 nM overnight prior to cell lysis for gel analysis or fixation for imaging.

756

#### 757 **Immunofluorescence (IF) in HEK293 and H4 cells**

758 Cells were fixed in 4% FPA for 10 minutes, washed 3X with DPBS, permeabilized in  
759 0.1% Triton X-100 (Fisher BP151-100) for 5 minutes, washed 3x with PBS, and blocked with  
760 5% bovine serum albumin (BSA) for 1 hour. Primary antibodies were diluted to desired  
761 concentration in 5% BSA and incubated overnight at 4 deg. Slides were washed 3x with DPBS  
762 and secondary antibodies were added at appropriate dilution in 5% BSA and allowed to incubate  
763 at room temperature for 1 hour. Slides were washed 2x with DPBS and then incubated in DAPI  
764 diluted in PBS (1ug/mL) for 5 minutes at RT, washed 1X with DPBS and then mounted on  
765 microscope slides with Prolong glass antifade mountant.

766

#### 767 **Fluorescence in-situ hybridization (FISH)**

768 As previously described (Khong et al., 2017) , cells were fixed in 4% PFA for 10  
769 minutes, washed 3x with PBS, permeabilized in 70% ethanol for 1 hour at 4 deg. Cells were then  
770 incubated in a wash buffer consisting of 2X nuclease free SSC and 10% deionized formamide  
771 (Calbiochem 4610) for 5 minutes at room temperature. The FISH probes were diluted to desired  
772 concentration in 100uL of hybridization buffer (2X nuclease-free SSC, 10% deionized  
773 formamide, 10% dextran sulfate) and spotted onto parafilm in a hybridization chamber (10cm  
774 cell culture dish lined with wet paper towels and covered with parafilm). Coverslips were then  
775 inverted onto the droplet of hybridization buffer contain the FISH probes and incubated at 37°C  
776 overnight. The slides were then transferred back to a 24 well plate and 500uL of 2X nuclease

777 free SSC with 10% deionized formamide was added for 30 minutes at 37°C. Cells were then  
778 incubated in DPBS with 1µg/mL DAPI at room temperature for 5 minutes, washed with 2X  
779 nuclease free SSC and incubated at room temperature for 5 minutes. Coverslips were mounted  
780 on microscope slides with ProLong Glass Antifade Mountant (ThermoFisher, P36980) and  
781 allowed to cure overnight at room temperature.  
782 minutes.

783

#### 784 **Image analysis**

785 To quantify FISH intensity within nuclear and cytosolic tau aggregates, ImageJ's  
786 freehand selection tool was used to draw perimeters around aggregates and in regions of bulk  
787 cytosol and nucleus. The average FISH intensity was measured within the selections and used to  
788 compare enrichment of RNAs.

789 To quantify the percentage of SRRM2 in the cytosol of cells, CellProfiler was used.  
790 Nuclei were identified using object detection with a typical diameter between 50-200 pixels for  
791 HEK293 and H4 cells, which were then used as a mask to quantify nuclear and cytosolic  
792 SRRM2 intensity. The percentage of total SRRM2 intensity in the cytosol was calculated by  
793 dividing the cytosolic SRRM2 intensity by the sum of the nuclear and cytosolic intensities per  
794 image.

795 To quantify enrichment scores of various proteins of interest (POIs) in tau aggregates, 25  
796 images were taken in a 5x5 panel of each slide using a 40x air objective on a Nikon Spinning  
797 Disc Confocal microscope. Ilastik was used to create the following segmentation masks:  
798 cytosolic tau aggregates, nuclear tau aggregates, nucleus, cytosol, and background. The RGB  
799 images and segmentation masks were fed into CellProfiler, which was used to quantify the

800 average POI intensity within tau aggregates and the average POI intensity within the  
801 corresponding compartment. Enrichment was defined as the ratio of POI intensity within the tau  
802 aggregate to the POI intensity within the corresponding compartment.

803

#### 804 **Florescent labeling of oligonucleotides for FISH**

805 As previously described (Gaspar et al., 2017), DNA oligonucleotides were labeled with  
806 ddUTP-Cy5 fluorophores using terminal deoxynucleotidyl transferase (TdT). DNA  
807 oligonucleotides were designed to be antisense to the target of interested with the following  
808 specifications: 18-22 nucleotides in length and a minimum of 2 nucleotide spacing between  
809 probes. 20uM of DNA oligonucleotides were mixed with 120uM of 5-Propargylamino-ddUTP-  
810 Cy5, 10 units of TdT, and 1X TdT buffer and incubated at 37°C for 16 hours. Following  
811 incubation, oligonucleotides were precipitated in 80% ethanol with 60mM Na-acetate at -80°C  
812 for 20 minutes. The oligonucleotides were pelleted by centrifugation at 16,000g for 20 minutes at  
813 4°C, washed with 80% ethanol 2x, air dried, and brought up in 20uL of nuclease free H2O. If  
814 necessary, a further round of purification can be performed with the Zymo Oligo Clean and  
815 Concentrate spin-column kit (Zymo D4060). Labeled probe concentration was measured via  
816 NanoDrop OneC UV-Vis Spectrophotometer (Thermo Scientific 840-274200).

817

#### 818 **Tau aggregate isolation from HEK293 cells via centrifugation and flow cytometry**

819 HEK293 biosensor cells were grown to 70-80% confluency in 245 mm square tissue  
820 culture treated dishes (Corning 07-200-599) in 50mL of DMEM (one plate per biologic  
821 replicate). 200 ug of WT or P301S tau clarified mouse brain homogenate was transfected per  
822 dish using lipofectamine 2000 and incubated at 37°C for 24 hours. Tau aggregation was

823 monitored using the Evos M500 Imaging System with a GFP filter. Cells were harvested by  
824 scraping, centrifuged at 200 rcf, snap frozen in liquid nitrogen, and stored at -80°C.

825 The cell pellet was thawed on ice for 5 minutes and resuspended in 6mL of high salt, high  
826 sucrose buffer containing RNase Inhibitors (10mM Tris-HCl pH 7.4, 0.8M NaCl, 1 mM EGTA,  
827 10% sucrose, 0.5% NP40, Complete ultra-protease inhibitor, PhosStop Phosphatase inhibitor,  
828 1:1500 RNasein, 1:300 Ribolock, 1:60 turbo DNase). Cell lysate was passed through a 25 G  
829 needle 3x to homogenize and 100uL of sample was taken to extract total RNA.

830 Large tau complexes were pelleted by centrifugation at 21,000g for 20 minutes at 4 °C,  
831 the pellet was brought up in high salt/high sucrose buffer, passed through a 27G needle, and  
832 centrifuged at 10,000g for 10 minutes at 4 °C. The pellet was brought up in 1mL of DPBS and  
833 centrifuged at 500g for 5 minutes at 4 °C to pellet large cellular debris. The supernatant (S3,  
834 enriched tau fraction) was taken and spotted onto a microscope slide for fluorescent imaging of  
835 tau aggregates in solution.

836 A BD Biosciences FACSAria Fusion flow cytometer was used to sort tau aggregates by  
837 fluorescence and size. The sheath fluid was changed to PBS, flow rate was set to 1.2, and  
838 threshold rate was set to <200 events/second. Gates were set on side scatter-H and 488  
839 fluorescence such that WT transfected S3 fractions had <1% of particles in sorted fraction and  
840 P301S transfected S3 fractions had >30% in the sorted fraction. Roughly 1 million particles were  
841 sorted for each sample. To ensure the flow cytometer was sorting particles properly, the sorted  
842 fraction was visually inspected by fluorescence microscopy and the sorted and waste fractions  
843 were run back through the flow cytometer.

844 To denature tau aggregates and extract RNA, the sorted fractions were brought up in  
845 Proteinase K buffer (2M Urea, 100ug/mL proteinase K, and 3mM DTT) and incubated at room

846 temperature for 15 minutes. Guanadinium HCl was added to a final concentration of 5M and  
847 incubated at room temperature for 30 minutes. RNA was then extracted with TRIzol LS reagent  
848 (ThermoFisher 10296010). RNA concentrations were measured by QuBit RNA HS Assay kit  
849 (ThermoFisher Q328521) and Agilent 4200 TapeStation using the High Sensitivity RNA  
850 ScreenTape (Agilent 5067-5579). All samples except for the WT transfected sorted fraction  
851 yielded sufficient RNA to prepare sequencing libraries (Fig S2B for TapeStation data). RNA  
852 sequencing libraries were then prepared from total RNA and tau aggregate associated RNA from  
853 HEK293 biosensor cells using the Roche KAPA RNA HyperPrep Kit with RiboErase (Kapa  
854 KK8560) and sequenced on an Illumina NextSeq sequencer at the University of Colorado,  
855 Boulder BioFrontiers Sequencing Core.

856

#### 857 **Isolation of tau aggregates from mouse brain**

858 Brains were harvested from two Tg21221 (WT 0N4R human tau mouse brains) and two  
859 rTg4510 (P301L 0N4R human tau) mice and snap frozen in liquid nitrogen. Samples were  
860 thawed on ice and weighed. The brain tissue was then homogenized on ice using a dounce  
861 homogenizer and diluted to 5 mL/g in homogenization buffer with RNase inhibitors (10mM  
862 Tris-HCl pH7.4, 0.8M NaCl, 1mM EGTA, 10% sucrose, 1X Roche protease inhibitor, 1:40  
863 promega RNasein). Aliquots were stored at -80 C.

864 To extract total RNA, 50uL of brain homogenate was incubated for 2 hours at room  
865 temperature in proteinase K buffer (2% SDS, 4M Urea, 10mM Tris-HCl pH4.54, 100ug/mL  
866 Proteinase K). 400uL of Urea buffer (60mM Tris-HCl pH 8.5, 8M Urea, 2% SDS) was then  
867 added and incubated for 30 minutes at room temperature. RNA was extracted from one half of  
868 this reaction using TRIzol LS solution and the other half was frozen at -80°C.



869           900uL of frozen brain homogenate was thawed on ice and 100uL of 10% (w/v) sarkosyl  
870 solution was added and incubated on ice for 15 minutes. Homogenate was then passed through a  
871 25G and 27G syringe. Protein concentrations were measured by QuBit Protein Assay Kit  
872 (Thermo Fisher, Q33211) and sarkosyl buffer (50mM HEPES pH 7.2, 250 mM sucrose, 1mM  
873 EDTA, 1% w/v sarkosyl, 0.5 M NaCl) was added to reach a final concentration of 10 mg/mL.  
874 500uL of each sample was transferred into an untracentrifuge tube (Beckman Coulter, 349623)  
875 and centrifuged at 180,000g for 30 min at 4 deg in a Beckman Coulter Optima MAX-XP  
876 Ultracentrifuge. The supernatant (S1 fraction) was removed and stored at -80°C. The pellet was  
877 then brought up in 500uL of sarkosyl buffer and run through a 25G needle to homogenize. The  
878 sample was then centrifuged at 180,000g for 30 min at 4°C and the supernatant (S2) was  
879 removed and stored at -80°C.

880           For the sarkosyl insoluble RNA sequencing, P2 pellet was brought up in 100uL of  
881 proteinase K buffer and incubated at RT for 2 hours at RT. To further solubilize the sample,  
882 400uL of urea buffer was added and incubated at RT for 30 minutes. The sample was then split  
883 in two and RNA was extracted from one half (250uL) using Trizol LS solution the other half was  
884 frozen at -80°C.

885           For the Tau IP, the P2 fraction was brought up in 400uL of PBS and protein  
886 concentrations were measured using the QuBit Protein Assay Kit (Thermo Fisher, Q33211).  
887 Samples were precleared with 15mg of DEPC treated (to inactivate RNase) protein A dynabeads  
888 at room temperature for 45 minutes at RT on rotator. While preclearing, Tau12 and IgG  
889 antibodies were conjugated to 50uL (1.5mg) of protein A dynabeads for 40 minutes on rotator.  
890 Following preclear step, the sample was split into two fractions (one for the Tau12 IP and one for  
891 the IgG IP). Dynabeads with conjugated antibody were washed with PBS, brought up in 50uL of

892 PBS and added to sample. IP was carried out on rotator at room temperature for 40 minutes.  
893 Sample was then washed 3x with PBS and 100uL of proteinase K buffer was added to the beads  
894 and incubated at RT for 2 hours. 400uL of urea buffer was added to beads and incubated for 30  
895 minutes to further denature. Samples were then split into two 250uL fractions, one was Trizol  
896 extracted. RNA concentrations were then measured by QuBit RNA HS Assay kit (ThermoFisher  
897 Q328521) and Agilent 4200 TapeStation using the High Sensitivity RNA ScreenTape (Agilent  
898 5067-5579). IgG IP did not pull down any RNA. RNA sequencing libraries were prepared using  
899 the Nugen Ovation SoLo RNA-Seq System, Mouse (Nugen 0501-32) and sequenced on an  
900 Illumina NovaSeq sequencer at the University of Colorado, Anschutz Genomics and Microarray  
901 Core.

902

### 903 **Analysis of RNA sequencing data**

904 Following sequencing, quality of sequencing reads were assessed using FASTQC version  
905 0.11.5, Illumina TruSeq3 adapters and low quality reads were trimmed off using Trimmomatic  
906 version 0.36 (Bolger et al., 2014). Reads that aligned uniquely to the ribosome, yeast, or bacteria  
907 were then filtered out using FastQ Screen (Wingett and Andrews, 2018). Reads were aligned  
908 using the Spliced Transcripts Alignment to a Reference (STAR) aligner version 2.6.0 (Dobin et  
909 al., 2013) to either the Genome Reference Consortium Human Build 38 (GRCh38, acquired from  
910 NCBI) or the Genome Reference Consortium Mouse Build 38 (GRCm38, acquired from NCBI)  
911 depending on the species being analyzed. Adjusted p-values were calculated from raw read  
912 counts using DEseq2. Gene counts were used to calculate Fragments per kilobase per million  
913 read (FPKM) using transcript lengths retrieved from the Ensembl Biomart (Kinsella et al., 2011)  
914 and the following formula  $FPKM = (\# \text{ of mapped fragments} * 10^3 * 10^6) / (\text{transcript length in bp} * 10^6)$

915 total number of mapped fragments). For mouse sequencing, FPKM values were used to calculate  
916 enrichment scores for each biological replicate by dividing the Tau IP FPKM by the Total RNA  
917 FPKM for each replicate. Enrichment scores were then used to calculate average enrichment  
918 score for each gene and fold changes between P301L and WT mice. Gene type enrichment was  
919 determined by calculating the percentage of FPKM made up by each gene type. Repetitive  
920 elements were analyzed using a reference files acquired from repeatmasker (hg38 - Dec 2013 -  
921 RepeatMasker open-4.05 – Repeat Library 20140131) and RepEnrich (Criscione et al., 2014).

922 Splicing analysis: Following mapping of reads to GRCh38 using STAR, MAJIQ v2.1  
923 was used with standard settings to quantify splicing changes. Voila was used to view results,  
924 generate splicing diagrams, and determine the relative percentage of each splicing type (only  
925 LSVs containing more than 10 reads were reported). To quantify reads mapping to introns,  
926 iREAD v0.8.5 was used along with an intron annotation file generated from ensemble v77. The  
927 read count output from iREAD was used as an input to DEseq2 for calling differential intron  
928 retention.

929

### 930 **Fluorescence recovery after photobleaching**

931 HEK293 biosensor cells were seeded in DMEM supplemented with 10% FBS and 0.2%  
932 penicillin-streptomycin at  $0.25 \times 10^5$  cells/mL in Grenier Bio-One CELLview dishes with Glass  
933 Bottoms (Thomas Scientific, 07-000-235) and grown overnight at 37°C. The next day, clarified  
934 P301S tau brain homogenate was transfected and grown for 24 hours. A Nikon A1R Laser  
935 Scanning Confocal with environmental chamber was used to image the cells. A circular region  
936 within a tau aggregate was defined and bleached using a 405nm laser set to 100% laser power.  
937 For determining the recovery of tau within tau aggregates (Fig S1B-C), fluorescence intensity

938 was measured continuously for 6 minutes and 30 seconds post bleaching (N=5). For determining  
939 the recovery of SRRM2\_FL-halo within splicing speckles with and without tau aggregates,  
940 fluorescence intensity was measured continuously for 30 seconds (n=5). For determining the  
941 recovery of SRSF2-mCherry within splicing speckles with and without tau aggregates,  
942 fluorescence intensity was measured every 1 second for 30 seconds (n=5).

943

944

945 **Mouse brain RNA fluorescent *in situ* hybridization followed by immunofluorescent**  
946 **staining (RNA FISH-IF)**

947 Control (B6/J) and Tg2541 animals at approximately 6 months of age were anesthetized  
948 for whole brain collection. The mouse brains were embedded in OCT compound (Sakura, 4583)  
949 and flash-frozen in chilled isopentane. Samples were sectioned at 12 $\mu$ m using a cryostat and  
950 mounted on glass slides. Samples were air-dried at room temperature for 20 minutes to ensure  
951 tissue adherence to slides, then fixed in cold 4% PFA/1X PBS for 15 minutes. Samples were  
952 washed 3 times in 1X PBS for 5 minutes/wash, followed by a wash in 1X SSC for 5 minutes.  
953 Samples were transferred into 0.1X citrate buffer (Sigma, C9999) for a gentle antigen retrieval at  
954 60°C for 1 hour 15 minutes. The slides were allowed to cool for 15 minutes, then rinsed 3 times  
955 in 1X SSC for 5 minutes/wash. Samples were then dehydrated in a graded series of ethanol  
956 washes (50%, 70%, 90% and 100%) for 3 minutes/wash and air-dried for 10 minutes. A  
957 hydrophobic barrier was drawn around the tissue and samples were blocked in a pre-  
958 hybridization buffer of 3% normal goat serum (NGS)/4X SSC at 37°C for 1 hour in a humidified  
959 chamber. Oligo(dT) probe labeled with Quasar 570 or Quasar 670 (Stellaris) was added to  
960 hybridization buffer (Stellaris, SMF-HB1-10) and incubated at 65°C for 10 minutes followed by

961 a cooling on ice for 2 minutes. Pre-hybridization buffer was removed, and samples were then  
962 incubated in probe/hybridization buffer at 37°C overnight.

963 The next day, samples were washed in a dilution series of pre-hybridization buffer (twice  
964 in 4X, then once in 2X, 1X, 0.1X) at 37°C for 10 minutes/wash. Samples were then blocked in  
965 20% NGS/1X PBST (0.1% Tween-20) at room temperature for 1 hour and incubated at room  
966 temperature overnight in primary antibodies diluted at 1:250 in 10% NGS/1X PBST.

967 The next day, samples were washed 3 times in 1X PBST for 10 minutes/wash, then  
968 incubated in Alexa Fluor secondary antibodies diluted at 1:500 in 10% NGS/1X PBST for 2  
969 hours at room temperature. Samples were washed 3 times in 1X PBST for 10 minutes/wash. To  
970 quench autofluorescence, samples were incubated in 0.1% Sudan Black B in 70% ethanol for 10  
971 minutes, then rinsed briefly in fresh 70% ethanol and transferred into 1X PBS for 5 minutes.  
972 Coverslips were mounted onto the slides using Vectashield Vibrance antifade mounting medium  
973 with DAPI (Vector Laboratories H-1800) and slides were left to dry overnight prior to being  
974 imaged with a Leica SP8 confocal microscope.

975

## 976 **Human brain immunofluorescent staining**

977 Human brain samples were provided by the Neurodegenerative Disease Brain Bank at the  
978 University of California, San Francisco, which receives funding support from NIH grants  
979 P01AG019724 and P50AG023501, the Consortium for Frontotemporal Dementia Research, and  
980 the Tau Consortium.

981 Formalin-fixed paraffin-embedded (FFPE) human brain samples from the left angular  
982 gyrus region of control individuals and patients diagnosed with corticobasal degeneration (CBD)  
983 were sliced at 8µm and mounted on glass slides. Samples were deparaffinized in a 60°C oven

984 overnight, followed by two 10-minute xylene washes. Samples were then rehydrated in a graded  
985 series of ethanol washes (twice in 100% then once each in 90%, 70%, 50%) for 3 minutes/wash.  
986 Slides were then rinsed in cold ultrapure MilliQ H<sub>2</sub>O and transferred into 0.1X citrate buffer  
987 (Sigma, C9999) for antigen retrieval in an autoclave at 120°C for 5 minutes. Slides were allowed  
988 to cool for 15 minutes, then rinsed in 1X PBST (0.25% Triton X-100) for 15 minutes. A  
989 hydrophobic barrier was drawn around the tissue and samples were blocked in 20% normal goat  
990 serum (NGS)/1X PBST at room temperature for 1 hour in a humidified chamber. Samples were  
991 incubated at room temperature overnight in primary antibodies diluted at 1:250 in 10% NGS/1X  
992 PBST.

993         The next day, samples were washed 3 times in 1X PBST for 10 minutes/wash, then  
994 incubated in Alexa Fluor secondary antibodies diluted at 1:500 in 10% NGS/1X PBST for 2  
995 hours at room temperature. Samples were washed 3 times in 1X PBST for 10 minutes/wash. To  
996 quench autofluorescence, samples were incubated in 0.1% Sudan Black B in 70% ethanol for 10  
997 minutes, then rinsed briefly in fresh 70% ethanol and transferred into 1X PBS for 5 minutes.  
998 Samples were incubated for 10 minutes in 5µg/mL DAPI diluted in 1X PBS, then washed for 10  
999 minutes in 1X PBS. Coverslips were mounted onto the slides using Vectashield Vibrance  
1000 antifade mounting medium (Vector Laboratories H-1700) and slides were left to dry overnight  
1001 prior to being imaged with a Leica SP8 confocal microscope.

1002

### 1003 **Human tissue samples for immunohistochemistry**

1004         AD, FTD and non-neurologic disease control post-mortem tissue samples were obtained  
1005 from the University of Pittsburgh ALS Tissue Bank, the Barrow Neurological Institute ALS  
1006 Tissue Bank, and the Target ALS Human Postmortem Tissue Core. All tissues samples were

1007 collected after informed consent from the subjects or by the subjects' next of kin, complying  
1008 with all relevant ethical regulations. The protocol and consent process were approved by the  
1009 University of Pittsburgh Institutional Review Board (IRB) and the Dignity Health Institutional  
1010 Review Board. Clinical diagnoses were made by board certified neuropathologists. Subject  
1011 demographics are listed in Supplemental Table 3.

1012

### 1013 **Immunohistochemistry**

1014 Paraffin-embedded post-mortem frontal cortex tissue sections were used for this study.  
1015 All sections were deparaffinized, rehydrated and antigen retrieval performed using Target  
1016 Antigen Retrieval Solution, pH 9.0 (DAKO) for 20 min in a steamer. After cooling to room  
1017 temperature, non-specific binding sites were blocked using Super Block (Scytek), supplemented  
1018 with Avidin (Vector Labs). Primary antibodies used for immunohistochemistry were incubated  
1019 overnight in Super Block with Biotin. Slides were then washed and incubated for 1 h in the  
1020 appropriate biotinylated IgG secondary antibodies (1:200; Vector Labs) in Super Block. Slides  
1021 were washed in PBS and immunostaining visualized using the Vectastain Elite ABC reagent  
1022 (Vector Labs) and Vector Impact NovaRED peroxidase substrate kit (Vector Labs). Slides  
1023 were counterstained with hematoxylin (Sigma Aldrich) and pictures were captured using an  
1024 OLYMPUS BX40 microscope equipped with a SebaCam camera.

### 1025 **Antibody information**

| <b>Antibody name</b>                    | <b>Manufacturer</b> | <b>Catalog #</b> |
|-----------------------------------------|---------------------|------------------|
| Mouse anti-phospho tau S202, Thr205     | Invitrogen          | MN1020           |
| Rabbit anti-pTau Thr205                 | Invitrogen          | 44-738G          |
| Mouse anti-pTau (Ser202, Thr205)<br>AT8 | Invitrogen          | MN1020           |
| Mouse anti-SRRM2 (SC-35)                | Abcam               | Ab11826          |
| Rabbit anti-Pinin                       | Thermo Scientific   | 18266-1-AP       |
| Rabbit anti-SFPQ                        | Abcam               | Ab177149         |
| Rabbit anti-ZC3H14 (MSUT2)              | Sigma-Aldrich       | HPA049798        |

|                              |                 |           |
|------------------------------|-----------------|-----------|
| Rabbit anti-DDX39B           | OriGene         | TA890032  |
| Rabbit anti-DYRK1A           | Abcam           | ab65220   |
| Rabbit anti-SRSF2            | Abcam           | Ab204916  |
| Rabbit anti-SNRNP70 (U1-70K) | Abcam           | ab83306   |
| Rabbit anti-PABP             | Abcam           | ab21060   |
| Rabbit anti-TIA1             | Abcam           | ab40693   |
| Rabbit anti-SRRM3            | Sigma-Aldrich   | HPA019337 |
| Rabbit anti-SRSF1 (SF2)      | Abcam           | ab129108  |
| Mouse anti-G3BP              | Abcam           | ab56574   |
| Rabbit anti-SNRPA1           | Millipore Sigma | HPA045622 |
| Rabbit anti-PQBP1            | Millipore Sigma | HPA001880 |
| Rabbit anti-PNISR            | Millipore Sigma | HPA038796 |
| Rabbit anti-RPF1             | Sigma-Aldrich   | HPA024642 |
| Rabbit anti-U2AF1            | Sigma-Aldrich   | HPA044833 |
| Rabbit anti-SON              | Thermo Fisher   | PA565108  |
| Rabbit anti-Fibrillarin      | Invitrogen      | MA1-22000 |
| Goat anti-mouse 647          | Abcam           | Ab150115  |
| Goat anti-rabbit 647         | Abcam           | Ab150079  |

1026

1027 **Fluorescence in-situ hybridization probe information**

| Probe name and label | Sequence(s)                                                                                                                                                                                                                                                                                                                          |
|----------------------|--------------------------------------------------------------------------------------------------------------------------------------------------------------------------------------------------------------------------------------------------------------------------------------------------------------------------------------|
| Oligo(dT)-Cy5        | TTT                                                                                                                                                                                                                                                                                              |
| Oligo(dT)-Quasar670  | TTT                                                                                                                                                                                                                                                                                              |
| U2 snRNA-Cy5         | 1: CCAAAAGGCCGAGAAGCGAT<br>2: ACAGATACTACACTTGATCT<br>3: CTCGGATAGAGGACGTATCA<br>4: CCTGCTCCAAAAATCCATTT<br>5: CGTGGAGTGGACGGAGCAAG<br>6: TGGAGGTACTGCAATACCAG                                                                                                                                                                       |
| RNU6ATAC snRNA-AF647 | AAAAAACGATGGTTAGATGCCACG                                                                                                                                                                                                                                                                                                             |
| snoRA73B-AF647       | AGCCCTAAGCTCCCCTATGCCAC                                                                                                                                                                                                                                                                                                              |
| snoRD3A-AF647        | GCGTTCTCTCCCTCTCACTCCCAATA                                                                                                                                                                                                                                                                                                           |
| NUCKS1-Cy5           | 1: GAGAAGCCAAAGACCAGGAC<br>2: CGACATGTTTCGCTGTCGAAA<br>3: TCTCGGGGAGATGATCGAAT<br>4: AATCTTTCTCCTGGAATGGT<br>5: TTCCTTTGATGCCTTTGAAG<br>6: GCCAAAACCATGTTCTATCT<br>7: ACTGAAAGCCCATGAGTCAA<br>8: CCTCATCGGTGGAAGTTTAA<br>9: ATTCATCTTTATCTCCTACC<br>10: ACCTGTAGACTGATCTTGTT<br>11: AGGGCCAGGAAAATAGTGTC<br>12: CTAGTCAAGGACAGGATGGG |



|         |                                                                                                                                                                                                                                                                                                                                                                                                                                                                                                                                                                                                                                                                                                                                                                                                                                                                                                                                                                                                                                                                                        |
|---------|----------------------------------------------------------------------------------------------------------------------------------------------------------------------------------------------------------------------------------------------------------------------------------------------------------------------------------------------------------------------------------------------------------------------------------------------------------------------------------------------------------------------------------------------------------------------------------------------------------------------------------------------------------------------------------------------------------------------------------------------------------------------------------------------------------------------------------------------------------------------------------------------------------------------------------------------------------------------------------------------------------------------------------------------------------------------------------------|
|         | <p>13: CTGAATTGTATGGGAGCAGC<br/>14: ACTGCTTTTATAAGGCGTGT<br/>15: AAACCTACGGATCTATCTCC<br/>16: CGCCTGGTATTAGATGTGAA<br/>17: CATACCAGGACCCTTTAAAC<br/>18: GCCCAATCAAATGCACACAA<br/>19: GACTATTGAGCACCTGTATC<br/>20: TCCTGACATCACTATCAAGC<br/>21: CTCCTGAGCACTGCAAAT<br/>22: AGGTAAACCTAGCAGAGCTA<br/>23: GAATGTAGTGTGTCAGTCAGCA<br/>24: TATGCTACGTATGTCTAGCT<br/>25: GGAGGACTAAAAGCAGCAGC<br/>26: TCCCTAAAGGAGGAAACACC<br/>27: TGTAAGCTCCTTCAAGGGAA<br/>28: ACTGGGGCAAACAGGTTATT<br/>29: TCTAGCTGACCATATTCACA<br/>30: AACGCTCTCAAAGCATCTCG<br/>31: TCTTTTATAAAGCTTTCCCC<br/>32: TACATTTTCCCTATCCTATG<br/>33: TAAGCCAACCTCTCCATTTTC<br/>34: TAGATAGCTTGATGTCCCAA<br/>35: TTTGTATCGAATTTACCCCA<br/>36: TCAGCACCCTGTGAATTTT<br/>37: GTTCCCAATAGTGGTTATT<br/>38: GCTCAAACAGATGTCACCAG<br/>39: ATTCTACCAGCCACACAAAG<br/>40: AGGGCATAAGCTGAGTACTA<br/>41: TTGCTGCAACATGTTTCATGG<br/>42: CCTTTCTTTAACCTTGTAGG<br/>43: AGCCCATGGACTAGTTAATA<br/>44: CACACGATTCTACCAATGCA<br/>45: ATCTGGGTTATAAAAGCCCT<br/>46: CAAAGTCAGGCTGAACTGGG<br/>47: GGTAAGTCTACTGCTTCTTG<br/>48: TTTGCTTTCCACAACACTTC</p> |
| Alu-Cy5 | <p>1: GAGACAGGGTCTCGCTCTGT<br/>2: CCCAGGCTGGAGTGCAGTGG<br/>3: CGATCATAGCTCACTGCAGC<br/>4: CGAACTCCTGGGCTCAAGCG<br/>5: CCTCCTGCCTCAGCCTCCCG<br/>6: TAGCTGGGACTACAGGCGCG<br/>7: CCACCACGCCCGGCTAATTT<br/>8: GTATTTTTTGTAGAGACGGG<br/>9: CTCGCTATGTTGCCAGGCT<br/>10: TCTCGAACTCCTGGGCTCAA</p>                                                                                                                                                                                                                                                                                                                                                                                                                                                                                                                                                                                                                                                                                                                                                                                             |

|  |                                                                                |
|--|--------------------------------------------------------------------------------|
|  | 11: GATCCTCCCGCCTCGGCCTC<br>12: AAAGTGCTGGGATTACAGGC<br>13: GAGCCACCGCGCCCGGCC |
|--|--------------------------------------------------------------------------------|

1028

- 1029
- 1030
- 1031 Ambadipudi, S., Biernat, J., Riedel, D., Mandelkow, E., and Zweckstetter, M. (2017). Liquid-liquid  
1032 phase separation of the microtubule-binding repeats of the Alzheimer-related protein Tau. *Nat*  
1033 *Commun* *8*, 275.
- 1034 Aoyagi, A., Condello, C., Stöhr, J., Yue, W., Rivera, B.M., Lee, J.C., Woerman, A.L., Halliday, G.,  
1035 Duinen, S. van, Ingelsson, M., et al. (2019). A $\beta$  and tau prion-like activities decline with longevity  
1036 in the Alzheimer's disease human brain. *Science Translational Medicine* *11*.
- 1037 Apicco, D.J., Ash, P.E.A., Maziuk, B., LeBlang, C., Medalla, M., Abdullatif, A.A., Ferragud, A.,  
1038 Botelho, E., Ballance, H.I., Dhawan, U., et al. (2018). Reducing the RNA binding protein TIA1  
1039 protects against tau-mediated neurodegeneration in vivo. *Nat Neurosci* *21*, 72–80.
- 1040 Apicco, D.J., Zhang, C., Maziuk, B., Jiang, L., Ballance, H.I., Boudeau, S., Ung, C., Li, H., and  
1041 Wolozin, B. (2019). Dysregulation of RNA Splicing in Tauopathies. *Cell Rep* *29*, 4377–4388.e4.
- 1042 Bai, B., Hales, C.M., Chen, P.-C., Gozal, Y., Dammer, E.B., Fritz, J.J., Wang, X., Xia, Q., Duong,  
1043 D.M., Street, C., et al. (2013). U1 small nuclear ribonucleoprotein complex and RNA splicing  
1044 alterations in Alzheimer's disease. *PNAS* *110*, 16562–16567.
- 1045 Bolger, A.M., Lohse, M., and Usadel, B. (2014). Trimmomatic: a flexible trimmer for Illumina  
1046 sequence data. *Bioinformatics* *30*, 2114–2120.
- 1047 Brandt, R., Léger, J., and Lee, G. (1995). Interaction of tau with the neural plasma membrane  
1048 mediated by tau's amino-terminal projection domain. *J. Cell Biol.* *131*, 1327–1340.
- 1049 Broccolini, A., Engel, W.K., Alvarez, R.B., and Askanas, V. (2000). Paired helical filaments of  
1050 inclusion-body myositis muscle contain RNA and survival motor neuron protein. *Am. J. Pathol.*  
1051 *156*, 1151–1155.
- 1052 Buée, L., Bussièrè, T., Buée-Scherrer, V., Delacourte, A., and Hof, P.R. (2000). Tau protein  
1053 isoforms, phosphorylation and role in neurodegenerative disorders<sup>11</sup>These authors  
1054 contributed equally to this work. *Brain Research Reviews* *33*, 95–130.
- 1055 Bukar Maina, M., Al-Hilaly, Y.K., and Serpell, L.C. (2016). Nuclear Tau and Its Potential Role in  
1056 Alzheimer's Disease. *Biomolecules* *6*.
- 1057 Burke, J.M., Moon, S.L., Matheny, T., and Parker, R. (2019). RNase L Reprograms Translation by  
1058 Widespread mRNA Turnover Escaped by Antiviral mRNAs. *Mol. Cell* *75*, 1203–1217.e5.
- 1059 Chen, J., Kanai, Y., Cowan, N.J., and Hirokawa, N. (1992). Projection domains of MAP2 and tau  
1060 determine spacings between microtubules in dendrites and axons. *Nature* *360*, 674–677.

- 1061 Criscione, S.W., Zhang, Y., Thompson, W., Sedivy, J.M., and Neretti, N. (2014). Transcriptional  
1062 landscape of repetitive elements in normal and cancer human cells. *BMC Genomics* *15*, 583.
- 1063 Delaval, B., and Doxsey, S.J. (2010). Pericentrin in cellular function and disease. *J Cell Biol* *188*,  
1064 181–190.
- 1065 DeVos, S.L., Corjuc, B.T., Commins, C., Dujardin, S., Bannon, R.N., Corjuc, D., Moore, B.D.,  
1066 Bennett, R.E., Jorfi, M., Gonzales, J.A., et al. (2018). Tau reduction in the presence of amyloid- $\beta$   
1067 prevents tau pathology and neuronal death in vivo. *Brain* *141*, 2194–2212.
- 1068 Diner, I., Nguyen, T., and Seyfried, N.T. (2017). Enrichment of Detergent-insoluble Protein  
1069 Aggregates from Human Postmortem Brain. *J Vis Exp*.
- 1070 Dinkel, P.D., Holden, M.R., Matin, N., and Margittai, M. (2015). RNA Binds to Tau Fibrils and  
1071 Sustains Template-Assisted Growth. *Biochemistry* *54*, 4731–4740.
- 1072 Dobin, A., Davis, C.A., Schlesinger, F., Drenkow, J., Zaleski, C., Jha, S., Batut, P., Chaisson, M.,  
1073 and Gingeras, T.R. (2013). STAR: ultrafast universal RNA-seq aligner. *Bioinformatics* *29*, 15–21.
- 1074 Falcon, B., Zhang, W., Murzin, A.G., Murshudov, G., Garringer, H.J., Vidal, R., Crowther, R.A.,  
1075 Ghetti, B., Scheres, S.H.W., and Goedert, M. (2018). Structures of filaments from Pick’s disease  
1076 reveal a novel tau protein fold. *Nature* *561*, 137–140.
- 1077 Falcon, B., Zivanov, J., Zhang, W., Murzin, A.G., Garringer, H.J., Vidal, R., Crowther, R.A., Newell,  
1078 K.L., Ghetti, B., Goedert, M., et al. (2019). Novel tau filament fold in chronic traumatic  
1079 encephalopathy encloses hydrophobic molecules. *Nature* *568*, 420–423.
- 1080 Fitzpatrick, A.W.P., Falcon, B., He, S., Murzin, A.G., Murshudov, G., Garringer, H.J., Crowther,  
1081 R.A., Ghetti, B., Goedert, M., and Scheres, S.H.W. (2017). Cryo-EM structures of tau filaments  
1082 from Alzheimer’s disease. *Nature* *547*, 185–190.
- 1083 Galganski, L., Urbanek, M.O., and Krzyzosiak, W.J. (2017). Nuclear speckles: molecular  
1084 organization, biological function and role in disease. *Nucleic Acids Res* *45*, 10350–10368.
- 1085 Gärtner, U., Janke, C., Holzer, M., Vanmechelen, E., and Arendt, T. (1998). Postmortem changes  
1086 in the phosphorylation state of tau-protein in the rat brain. *Neurobiol. Aging* *19*, 535–543.
- 1087 Gaspar, I., Wippich, F., and Ephrussi, A. (2017). Enzymatic production of single-molecule FISH  
1088 and RNA capture probes. *RNA* *23*, 1582–1591.
- 1089 Gil, L., Federico, C., Pinedo, F., Bruno, F., Rebolledo, A.B., Montoya, J.J., Olazabal, I.M., Ferrer, I.,  
1090 and Saccone, S. (2017). Aging dependent effect of nuclear tau. *Brain Research* *1677*, 129–137.
- 1091 Ginsberg, S.D., Crino, P.B., Lee, V.M., Eberwine, J.H., and Trojanowski, J.Q. (1997).  
1092 Sequestration of RNA in Alzheimer’s disease neurofibrillary tangles and senile plaques. *Ann.*  
1093 *Neurol.* *41*, 200–209.

- 1094 Ginsberg, S.D., Galvin, J.E., Chiu, T.S., Lee, V.M., Masliah, E., and Trojanowski, J.Q. (1998). RNA  
1095 sequestration to pathological lesions of neurodegenerative diseases. *Acta Neuropathol.* *96*,  
1096 487–494.
- 1097 Goedert, M. (2005). Tau gene mutations and their effects. *Movement Disorders* *20*, S45–S52.
- 1098 Goedert, M., and Spillantini, M.G. (2000). Tau mutations in frontotemporal dementia FTDP-17  
1099 and their relevance for Alzheimer’s disease. *Biochim. Biophys. Acta* *1502*, 110–121.
- 1100 Goedert, M., Wischik, C.M., Crowther, R.A., Walker, J.E., and Klug, A. (1988). Cloning and  
1101 sequencing of the cDNA encoding a core protein of the paired helical filament of Alzheimer  
1102 disease: identification as the microtubule-associated protein tau. *Proc. Natl. Acad. Sci. U.S.A.*  
1103 *85*, 4051–4055.
- 1104 Grainger, R.J., Barrass, J.D., Jacquier, A., Rain, J.-C., and Beggs, J.D. (2009). Physical and genetic  
1105 interactions of yeast Cwc21p, an ortholog of human SRm300/SRRM2, suggest a role at the  
1106 catalytic center of the spliceosome. *RNA* *15*, 2161–2173.
- 1107 Graser, S., Stierhof, Y.-D., Lavoie, S.B., Gassner, O.S., Lamla, S., Le Clech, M., and Nigg, E.A.  
1108 (2007). Cep164, a novel centriole appendage protein required for primary cilium formation. *J*  
1109 *Cell Biol* *179*, 321–330.
- 1110 Gunawardana, C.G., Mehrabian, M., Wang, X., Mueller, I., Lubambo, I.B., Jonkman, J.E.N.,  
1111 Wang, H., and Schmitt-Ulms, G. (2015). The Human Tau Interactome: Binding to the  
1112 Ribonucleoproteome, and Impaired Binding of the Proline-to-Leucine Mutant at Position 301  
1113 (P301L) to Chaperones and the Proteasome. *Mol. Cell Proteomics* *14*, 3000–3014.
- 1114 Guthrie, C.R., Greenup, L., Leverenz, J.B., and Kraemer, B.C. (2011). MSUT2 is a determinant of  
1115 susceptibility to tau neurotoxicity. *Hum Mol Genet* *20*, 1989–1999.
- 1116 Hales, C.M., Dammer, E.B., Diner, I., Yi, H., Seyfried, N.T., Gearing, M., Glass, J.D., Montine, T.J.,  
1117 Levey, A.I., and Lah, J.J. (2014a). Aggregates of small nuclear ribonucleic acids (snRNAs) in  
1118 Alzheimer’s disease. *Brain Pathol.* *24*, 344–351.
- 1119 Hales, C.M., Seyfried, N.T., Dammer, E.B., Duong, D., Yi, H., Gearing, M., Troncoso, J.C., Mufson,  
1120 E.J., Thambisetty, M., Levey, A.I., et al. (2014b). U1 small nuclear ribonucleoproteins (snRNPs)  
1121 aggregate in Alzheimer’s disease due to autosomal dominant genetic mutations and trisomy 21.  
1122 *Mol Neurodegener* *9*, 15.
- 1123 Hanseeuw, B.J., Betensky, R.A., Jacobs, H.I.L., Schultz, A.P., Sepulcre, J., Becker, J.A., Cosio,  
1124 D.M.O., Farrell, M., Quiroz, Y.T., Mormino, E.C., et al. (2019). Association of Amyloid and Tau  
1125 With Cognition in Preclinical Alzheimer Disease: A Longitudinal Study. *JAMA Neurol.*
- 1126 Holmes, B.B., Furman, J.L., Mahan, T.E., Yamasaki, T.R., Mirbaha, H., Eades, W.C., Belaygorod,  
1127 L., Cairns, N.J., Holtzman, D.M., and Diamond, M.I. (2014). Proteopathic tau seeding predicts  
1128 tauopathy in vivo. *Proc. Natl. Acad. Sci. U.S.A.* *111*, E4376-4385.

- 1129 Hsieh, Y.-C., Guo, C., Yalamanchili, H.K., Abreha, M., Al-Ouran, R., Li, Y., Dammer, E.B., Lah, J.J.,  
1130 Levey, A.I., Bennett, D.A., et al. (2019). Tau-Mediated Disruption of the Spliceosome Triggers  
1131 Cryptic RNA Splicing and Neurodegeneration in Alzheimer's Disease. *Cell Rep* 29, 301-316.e10.
- 1132 Huang, S., Deerinck, T.J., Ellisman, M.H., and Spector, D.L. (1994). In vivo analysis of the stability  
1133 and transport of nuclear poly(A)<sup>+</sup> RNA. *J. Cell Biol.* 126, 877-899.
- 1134 Ilik, İ.A., Malszycki, M., Lübke, A.K., Schade, C., Meierhofer, D., and Aktaş, T. (2020). SON and  
1135 SRRM2 are essential for nuclear speckle formation. *ELife* 9, e60579.
- 1136 Jiang, L., Ash, P.E.A., Maziuk, B.F., Ballance, H.I., Boudeau, S., Abdullatif, A.A., Orlando, M.,  
1137 Petrucelli, L., Ikezu, T., and Wolozin, B. (2019). TIA1 regulates the generation and response to  
1138 toxic tau oligomers. *Acta Neuropathol* 137, 259-277.
- 1139 Johnson, N.R., Condello, C., Guan, S., Oehler, A., Becker, J., Gavidia, M., Carlson, G.A., Giles, K.,  
1140 and Prusiner, S.B. (2017). Evidence for sortilin modulating regional accumulation of human tau  
1141 prions in transgenic mice. *PNAS* 114, E11029-E11036.
- 1142 Kampers, T., Friedhoff, P., Biernat, J., Mandelkow, E.M., and Mandelkow, E. (1996). RNA  
1143 stimulates aggregation of microtubule-associated protein tau into Alzheimer-like paired helical  
1144 filaments. *FEBS Lett.* 399, 344-349.
- 1145 Kaufman, S.K., Sanders, D.W., Thomas, T.L., Ruchinkas, A.J., Vaquer-Alicea, J., Sharma, A.M.,  
1146 Miller, T.M., and Diamond, M.I. (2016). Tau Prion Strains Dictate Patterns of Cell Pathology,  
1147 Progression Rate, and Regional Vulnerability In Vivo. *Neuron* 92, 796-812.
- 1148 Khong, A., Matheny, T., Jain, S., Mitchell, S.F., Wheeler, J.R., and Parker, R. (2017). The Stress  
1149 Granule Transcriptome Reveals Principles of mRNA Accumulation in Stress Granules. *Molecular*  
1150 *Cell* 68, 808-820.e5.
- 1151 Kinsella, R.J., Kähäri, A., Haider, S., Zamora, J., Proctor, G., Spudich, G., Almeida-King, J., Staines,  
1152 D., Derwent, P., Kerhornou, A., et al. (2011). Ensembl BioMarts: a hub for data retrieval across  
1153 taxonomic space. *Database (Oxford)* 2011.
- 1154 Kiss, T. (2002). Small Nucleolar RNAs: An Abundant Group of Noncoding RNAs with Diverse  
1155 Cellular Functions. *Cell* 109, 145-148.
- 1156 Kota, K.P., Wagner, S.R., Huerta, E., Underwood, J.M., and Nickerson, J.A. (2008). Binding of ATP  
1157 to UAP56 is necessary for mRNA export. *Journal of Cell Science* 121, 1526-1537.
- 1158 Lagier-Tourenne, C., Polymenidou, M., Hutt, K.R., Vu, A.Q., Baughn, M., Huelga, S.C., Clutario,  
1159 K.M., Ling, S.-C., Liang, T.Y., Mazur, C., et al. (2012). Divergent roles of ALS-linked proteins  
1160 FUS/TLS and TDP-43 intersect in processing long pre-mRNAs. *Nat. Neurosci.* 15, 1488-1497.
- 1161 Lee, G., Newman, S.T., Gard, D.L., Band, H., and Panchamoorthy, G. (1998). Tau interacts with  
1162 src-family non-receptor tyrosine kinases. *J. Cell. Sci.* 111 ( Pt 21), 3167-3177.

- 1163 Li, H.-D., Funk, C.C., and Price, N.D. (2020). iREAD: a tool for intron retention detection from  
1164 RNA-seq data. *BMC Genomics* 21, 128.
- 1165 Liu, C., and Götz, J. (2013). Profiling Murine Tau with 0N, 1N and 2N Isoform-Specific Antibodies  
1166 in Brain and Peripheral Organs Reveals Distinct Subcellular Localization, with the 1N Isoform  
1167 Being Enriched in the Nucleus. *PLOS ONE* 8, e84849.
- 1168 Love, M.I., Huber, W., and Anders, S. (2014). Moderated estimation of fold change and  
1169 dispersion for RNA-seq data with DESeq2. *Genome Biology* 15, 550.
- 1170 Maj, M., Gartner, W., Ilhan, A., Neziri, D., Attems, J., and Wagner, L. (2010). Expression of TAU  
1171 in insulin-secreting cells and its interaction with the calcium-binding protein secretagogin.  
1172 *Journal of Endocrinology* 205, 25–36.
- 1173 Maziuk, B.F., Apicco, D.J., Cruz, A.L., Jiang, L., Ash, P.E.A., da Rocha, E.L., Zhang, C., Yu, W.H.,  
1174 Leszyk, J., Abisambra, J.F., et al. (2018). RNA binding proteins co-localize with small tau  
1175 inclusions in tauopathy. *Acta Neuropathol Commun* 6, 71.
- 1176 Meier, S., Bell, M., Lyons, D.N., Rodriguez-Rivera, J., Ingram, A., Fontaine, S.N., Mechas, E.,  
1177 Chen, J., Wolozin, B., LeVine, H., et al. (2016). Pathological Tau Promotes Neuronal Damage by  
1178 Impairing Ribosomal Function and Decreasing Protein Synthesis. *J. Neurosci.* 36, 1001–1007.
- 1179 Montalbano, M., McAllen, S., Puangmalai, N., Sengupta, U., Bhatt, N., Johnson, O.D., Kharas,  
1180 M.G., and Kaye, R. (2020). RNA-binding proteins Musashi and tau soluble aggregates initiate  
1181 nuclear dysfunction. *Nature Communications* 11, 4305.
- 1182 Motameny, S., Wolters, S., Nürnberg, P., and Schumacher, B. (2010). Next Generation  
1183 Sequencing of miRNAs – Strategies, Resources and Methods. *Genes (Basel)* 1, 70–84.
- 1184 Orr, M.E., Sullivan, A.C., and Frost, B. (2017). A Brief Overview of Tauopathy: Causes,  
1185 Consequences, and Therapeutic Strategies. *Trends Pharmacol Sci* 38, 637–648.
- 1186 Park, S.A., Ahn, S.I., and Gallo, J.-M. (2016). Tau mis-splicing in the pathogenesis of  
1187 neurodegenerative disorders. *BMB Rep* 49, 405–413.
- 1188 Polymenidou, M., Lagier-Tourenne, C., Hutt, K.R., Huelga, S.C., Moran, J., Liang, T.Y., Ling, S.-C.,  
1189 Sun, E., Wancewicz, E., Mazur, C., et al. (2011). Long pre-mRNA depletion and RNA missplicing  
1190 contribute to neuronal vulnerability from loss of TDP-43. *Nature Neuroscience* 14, 459–468.
- 1191 Q, D., Wr, M., Q, C., F, L., and Jn, K. (2005). Ribosome dysfunction is an early event in  
1192 Alzheimer’s disease (*J Neurosci*).
- 1193 Rady, R.M., Zinkowski, R.P., and Binder, L.I. (1995). Presence of tau in isolated nuclei from  
1194 human brain. *Neurobiology of Aging* 16, 479–486.

- 1195 Raj, T., Li, Y.I., Wong, G., Humphrey, J., Wang, M., Ramdhani, S., Wang, Y.-C., Ng, B., Gupta, I.,  
1196 Haroutunian, V., et al. (2018). Integrative transcriptome analyses of the aging brain implicate  
1197 altered splicing in Alzheimer's disease susceptibility. *Nat Genet* 50, 1584–1592.
- 1198 Ramaswami, M., Taylor, J.P., and Parker, R. (2013). Altered Ribostasis: RNA-Protein Granules in  
1199 Degenerative Disorders. *Cell* 154, 727–736.
- 1200 Rino, J., Carvalho, T., Braga, J., Desterro, J.M.P., Lührmann, R., and Carmo-Fonseca, M. (2007). A  
1201 Stochastic View of Spliceosome Assembly and Recycling in the Nucleus. *PLoS Computational*  
1202 *Biology* 3.
- 1203 Sanders, D.W., Kaufman, S.K., DeVos, S.L., Sharma, A.M., Mirbaha, H., Li, A., Barker, S.J., Foley,  
1204 A.C., Thorpe, J.R., Serpell, L.C., et al. (2014). Distinct tau prion strains propagate in cells and  
1205 mice and define different tauopathies. *Neuron* 82, 1271–1288.
- 1206 Santa-Maria, I., Varghese, M., Ksiezak-Reding, H., Dzhun, A., Wang, J., and Pasinetti, G.M.  
1207 (2012). Paired helical filaments from Alzheimer disease brain induce intracellular accumulation  
1208 of Tau protein in aggresomes. *J. Biol. Chem.* 287, 20522–20533.
- 1209 Schmid-Burgk, J.L., Höning, K., Ebert, T.S., and Hornung, V. (2016). CRISPaint allows modular  
1210 base-specific gene tagging using a ligase-4-dependent mechanism. *Nature Communications* 7,  
1211 12338.
- 1212 Schröder, H.C., Bernd, A., Zahn, R.K., and Müller, W.E. (1984). Binding of polyribonucleotides  
1213 and polydeoxyribonucleotides to bovine brain microtubule protein: age-dependent modulation  
1214 via phosphorylation of high-molecular-weight microtubule-associated proteins and tau  
1215 proteins. *Mech. Ageing Dev.* 24, 101–117.
- 1216 Sepulveda, G., Antkowiak, M., Brust-Mascher, I., Mahe, K., Ou, T., Castro, N.M., Christensen,  
1217 L.N., Cheung, L., Jiang, X., Yoon, D., et al. (2018). Co-translational protein targeting facilitates  
1218 centrosomal recruitment of PCNT during centrosome maturation in vertebrates. *ELife* 7,  
1219 e34959.
- 1220 Siano, G., Varisco, M., Caiazza, M.C., Quercioli, V., Mainardi, M., Ippolito, C., Cattaneo, A., and  
1221 Di Primio, C. (2019). Tau Modulates VGluT1 Expression. *Journal of Molecular Biology* 431, 873–  
1222 884.
- 1223 Spector, D.L., and Lamond, A.I. (2011). Nuclear Speckles. *Cold Spring Harb Perspect Biol* 3.
- 1224 Tanaka, H., Kondo, K., Chen, X., Homma, H., Tagawa, K., Kerever, A., Aoki, S., Saito, T., Saido, T.,  
1225 Muramatsu, S.-I., et al. (2018). The intellectual disability gene PQBP1 rescues Alzheimer's  
1226 disease pathology. *Mol Psychiatry* 23, 2090–2110.
- 1227 Taylor, J.P., Brown, R.H., and Cleveland, D.W. (2016). Decoding ALS: from genes to mechanism.  
1228 *Nature* 539, 197–206.



- 1229 Ulrich, G., Salvadè, A., Boersema, P., Cali, T., Foglieni, C., Sola, M., Picotti, P., Papin, S., and  
1230 Paganetti, P. (2018). Phosphorylation of nuclear Tau is modulated by distinct cellular pathways.  
1231 *Scientific Reports* **8**, 1–14.
- 1232 Vanderweyde, T., Apicco, D.J., Youmans-Kidder, K., Ash, P.E.A., Cook, C., Lummertz da Rocha, E.,  
1233 Jansen-West, K., Frame, A.A., Citro, A., Leszyk, J.D., et al. (2016). Interaction of tau with the  
1234 RNA-Binding Protein TIA1 Regulates tau Pathophysiology and Toxicity. *Cell Reports* **15**, 1455–  
1235 1466.
- 1236 Vaquero-Garcia, J., Barrera, A., Gazzara, M.R., González-Vallinas, J., Lahens, N.F., Hogenesch,  
1237 J.B., Lynch, K.W., and Barash, Y. (2016). A new view of transcriptome complexity and regulation  
1238 through the lens of local splicing variations. *ELife* **5**, e11752.
- 1239 Violet, M., Delattre, L., Tardivel, M., Sultan, A., Chauderlier, A., Caillierez, R., Talahari, S.,  
1240 Nesslany, F., Lefebvre, B., Bonnefoy, E., et al. (2014). A major role for Tau in neuronal DNA and  
1241 RNA protection in vivo under physiological and hyperthermic conditions. *Front Cell Neurosci* **8**,  
1242 84.
- 1243 Violet, M., Chauderlier, A., Delattre, L., Tardivel, M., Chouala, M.S., Sultan, A., Marciniak, E.,  
1244 Humez, S., Binder, L., Kayed, R., et al. (2015). Prefibrillar Tau oligomers alter the nucleic acid  
1245 protective function of Tau in hippocampal neurons in vivo. *Neurobiol. Dis.* **82**, 540–551.
- 1246 Wagner, S., Chiosea, S., Ivshina, M., and Nickerson, J.A. (2004). In vitro FRAP reveals the ATP-  
1247 dependent nuclear mobilization of the exon junction complex protein SRm160. *J Cell Biol* **164**,  
1248 843–850.
- 1249 Wang, X., Wang, D., Zhao, J., Qu, M., Zhou, X., He, H., and He, R. (2006). The proline-rich  
1250 domain and the microtubule binding domain of protein tau acting as RNA binding domains.  
1251 *Protein Pept. Lett.* **13**, 679–685.
- 1252 Wegmann, S., Medalsy, I.D., Mandelkow, E., and Müller, D.J. (2013). The fuzzy coat of  
1253 pathological human Tau fibrils is a two-layered polyelectrolyte brush. *Proc. Natl. Acad. Sci.*  
1254 *U.S.A.* **110**, E313-321.
- 1255 Wheeler, J.M., McMillan, P., Strovass, T.J., Liachko, N.F., Amlie-Wolf, A., Kow, R.L., Klein, R.L.,  
1256 Szot, P., Robinson, L., Guthrie, C., et al. (2019). Activity of the poly(A) binding protein MSUT2  
1257 determines susceptibility to pathological tau in the mammalian brain. *Science Translational*  
1258 *Medicine* **11**.
- 1259 Wingett, S.W., and Andrews, S. (2018). FastQ Screen: A tool for multi-genome mapping and  
1260 quality control. *F1000Res* **7**.
- 1261 Wischik, C.M., Novak, M., Thøgersen, H.C., Edwards, P.C., Runswick, M.J., Jakes, R., Walker, J.E.,  
1262 Milstein, C., Roth, M., and Klug, A. (1988). Isolation of a fragment of tau derived from the core  
1263 of the paired helical filament of Alzheimer disease. *Proc Natl Acad Sci U S A* **85**, 4506–4510.

- 1264 Woerman, A.L., Aoyagi, A., Patel, S., Kazmi, S.A., Lobach, I., Grinberg, L.T., McKee, A.C., Seeley,  
1265 W.W., Olson, S.H., and Prusiner, S.B. (2016). Tau prions from Alzheimer's disease and chronic  
1266 traumatic encephalopathy patients propagate in cultured cells. *PNAS*.
- 1267 Xu, H., Yao, J., Wu, D.C., and Lambowitz, A.M. (2019). Improved TGIRT-seq methods for  
1268 comprehensive transcriptome profiling with decreased adapter dimer formation and bias  
1269 correction. *Scientific Reports* 9, 1–17.
- 1270 Yoshiyama, Y., Higuchi, M., Zhang, B., Huang, S.-M., Iwata, N., Saido, T.C., Maeda, J., Suhara, T.,  
1271 Trojanowski, J.Q., and Lee, V.M.-Y. (2007). Synapse loss and microglial activation precede  
1272 tangles in a P301S tauopathy mouse model. *Neuron* 53, 337–351.
- 1273 Zhang, Q., Kota, K.P., Alam, S.G., Nickerson, J.A., Dickinson, R.B., and Lele, T.P. (2016).  
1274 Coordinated dynamics of RNA splicing speckles in the nucleus. *J Cell Physiol* 231, 1269–1275.
- 1275 Zhang, W., Tarutani, A., Newell, K.L., Murzin, A.G., Matsubara, T., Falcon, B., Vidal, R., Garringer,  
1276 H.J., Shi, Y., Ikeuchi, T., et al. (2020). Novel tau filament fold in corticobasal degeneration.  
1277 *Nature* 1–7.
- 1278 Zhang, X., Lin, Y., Eschmann, N.A., Zhou, H., Rauch, J.N., Hernandez, I., Guzman, E., Kosik, K.S.,  
1279 and Han, S. (2017). RNA stores tau reversibly in complex coacervates. *PLoS Biol* 15.
- 1280 Zhang, X., Yan, C., Zhan, X., Li, L., Lei, J., and Shi, Y. (2018). Structure of the human activated  
1281 spliceosome in three conformational states. *Cell Research* 28, 307–322.
- 1282 Zimowska, G., Shi, J., Munguba, G., Jackson, M.R., Alpatov, R., Simmons, M.N., Shi, Y., and  
1283 Sugrue, S.P. (2003). Pinin/DRS/memA Interacts with SRp75, SRm300 and SRp130 in Corneal  
1284 Epithelial Cells. *Invest. Ophthalmol. Vis. Sci.* 44, 4715–4723.
- 1285

**Figure 1: Tau biosensor cell schematic and tau aggregates in mice contain poly(A) RNA.**

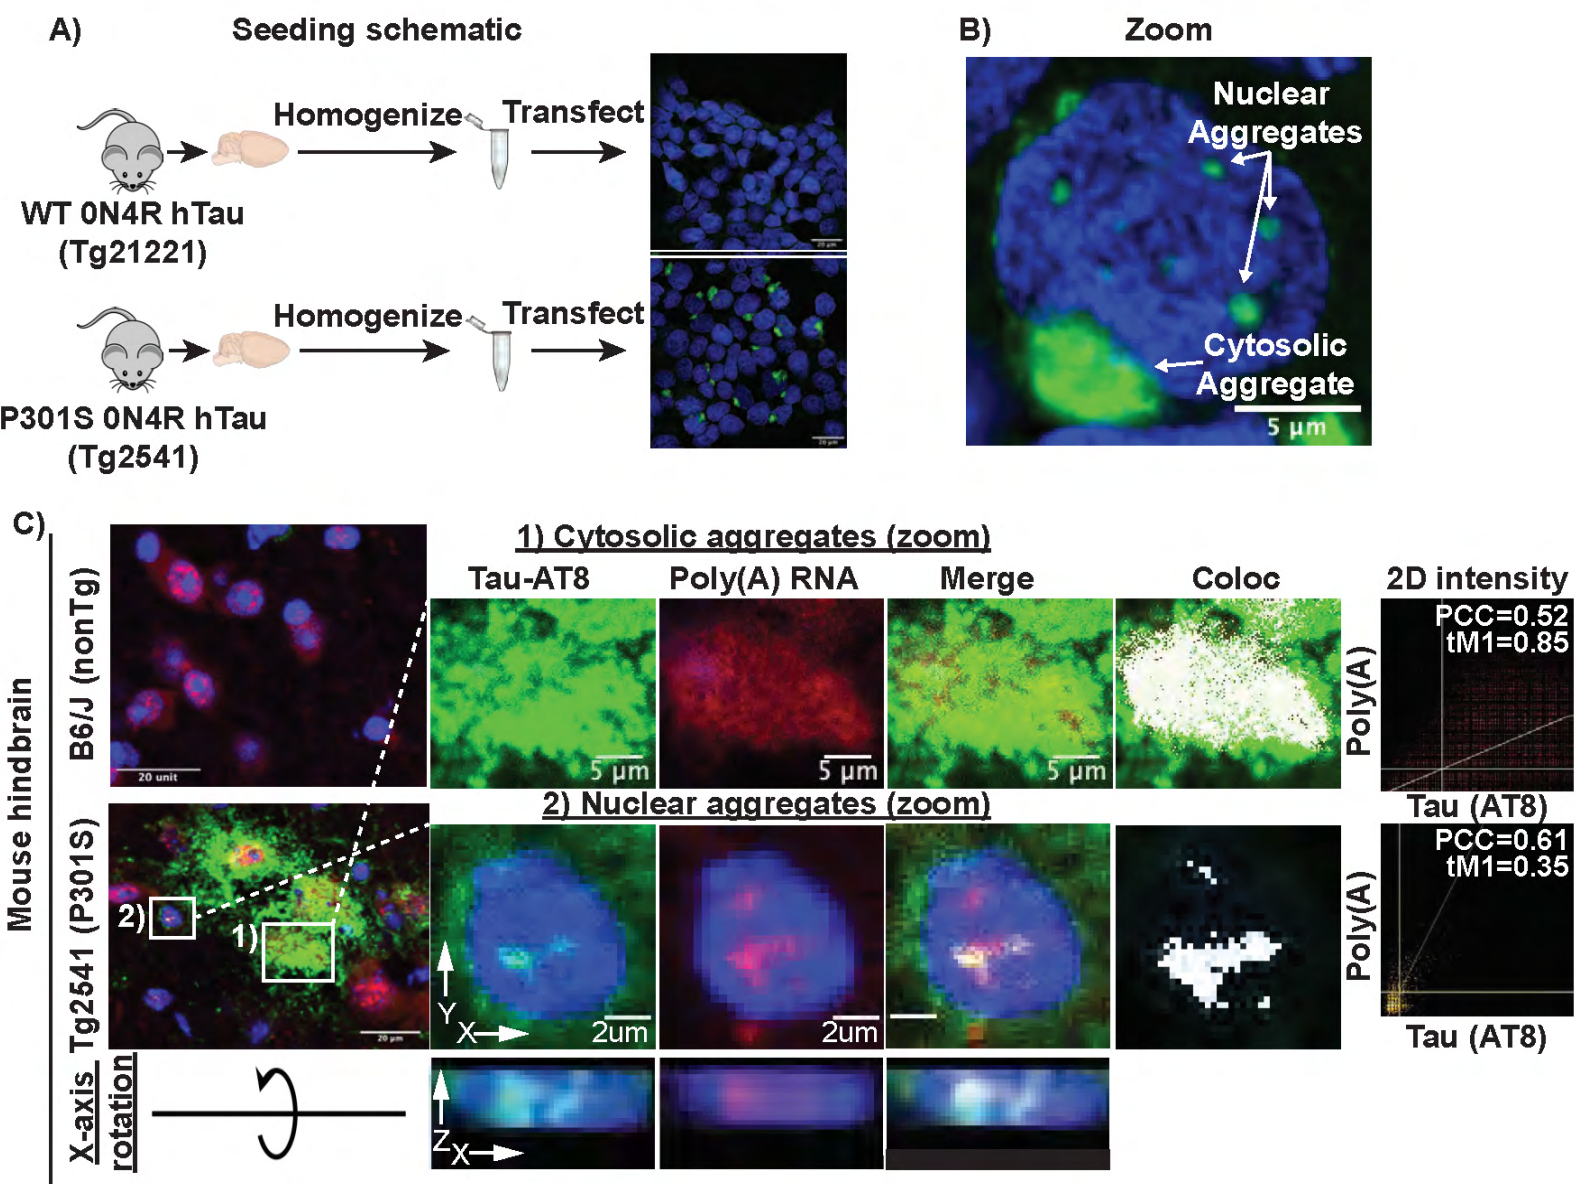

**Figure 2: The RNA composition of tau aggregates in cellular and mouse tauopathy model systems.**

**A) RNAs enriched in tau aggregates from HEK293 biosensor cells**

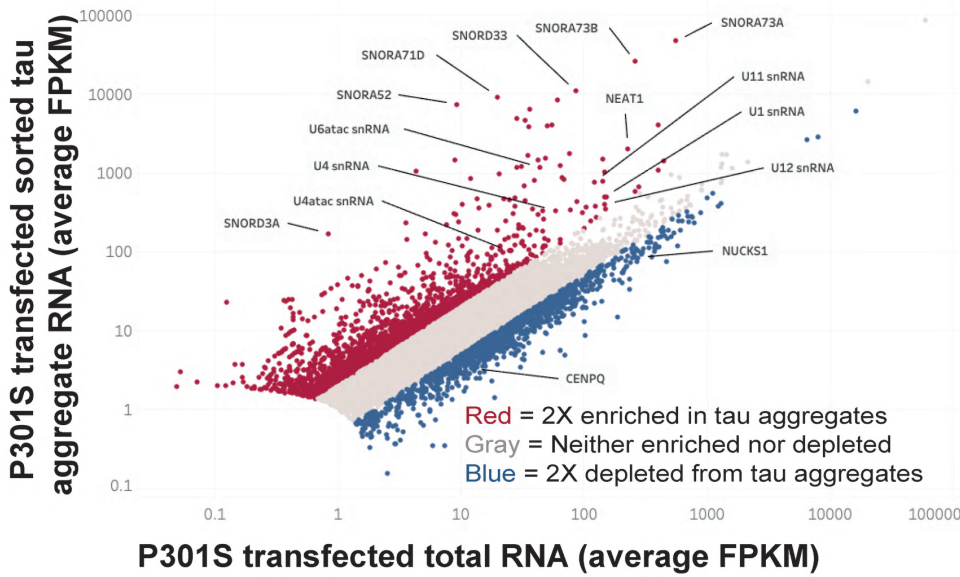

**B) Gene type enrichment in HEK293 tau aggregates**

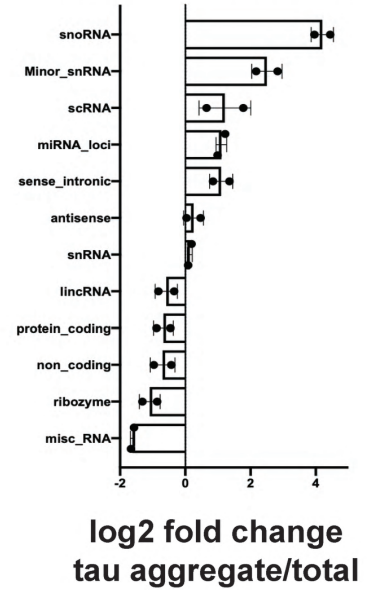

**C) RNAs associated with tau aggregates in P301L mice and WT mice**

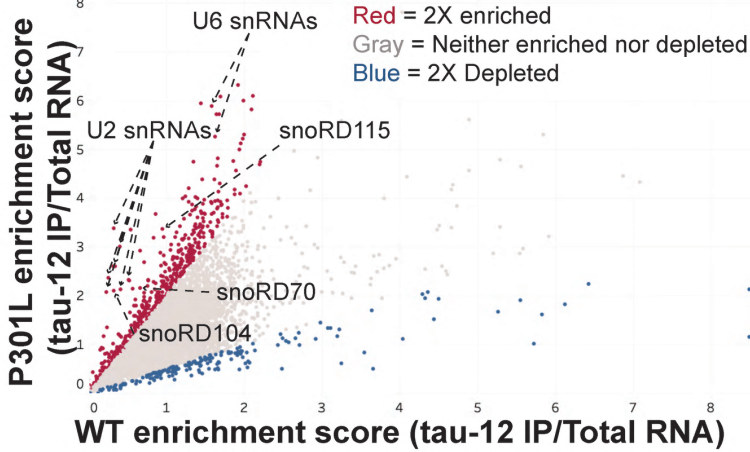

**D) P301L vs WT tau-12 IP gene type enrichment**

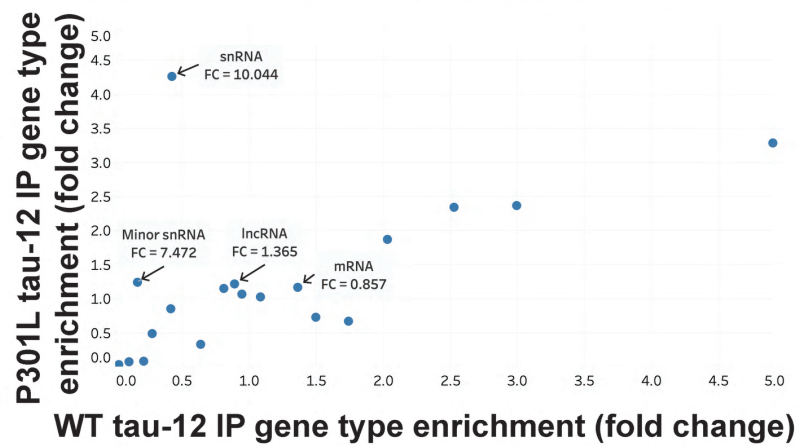

### Figure 3: FISH for RNAs in HEK293 tau biosensor cells

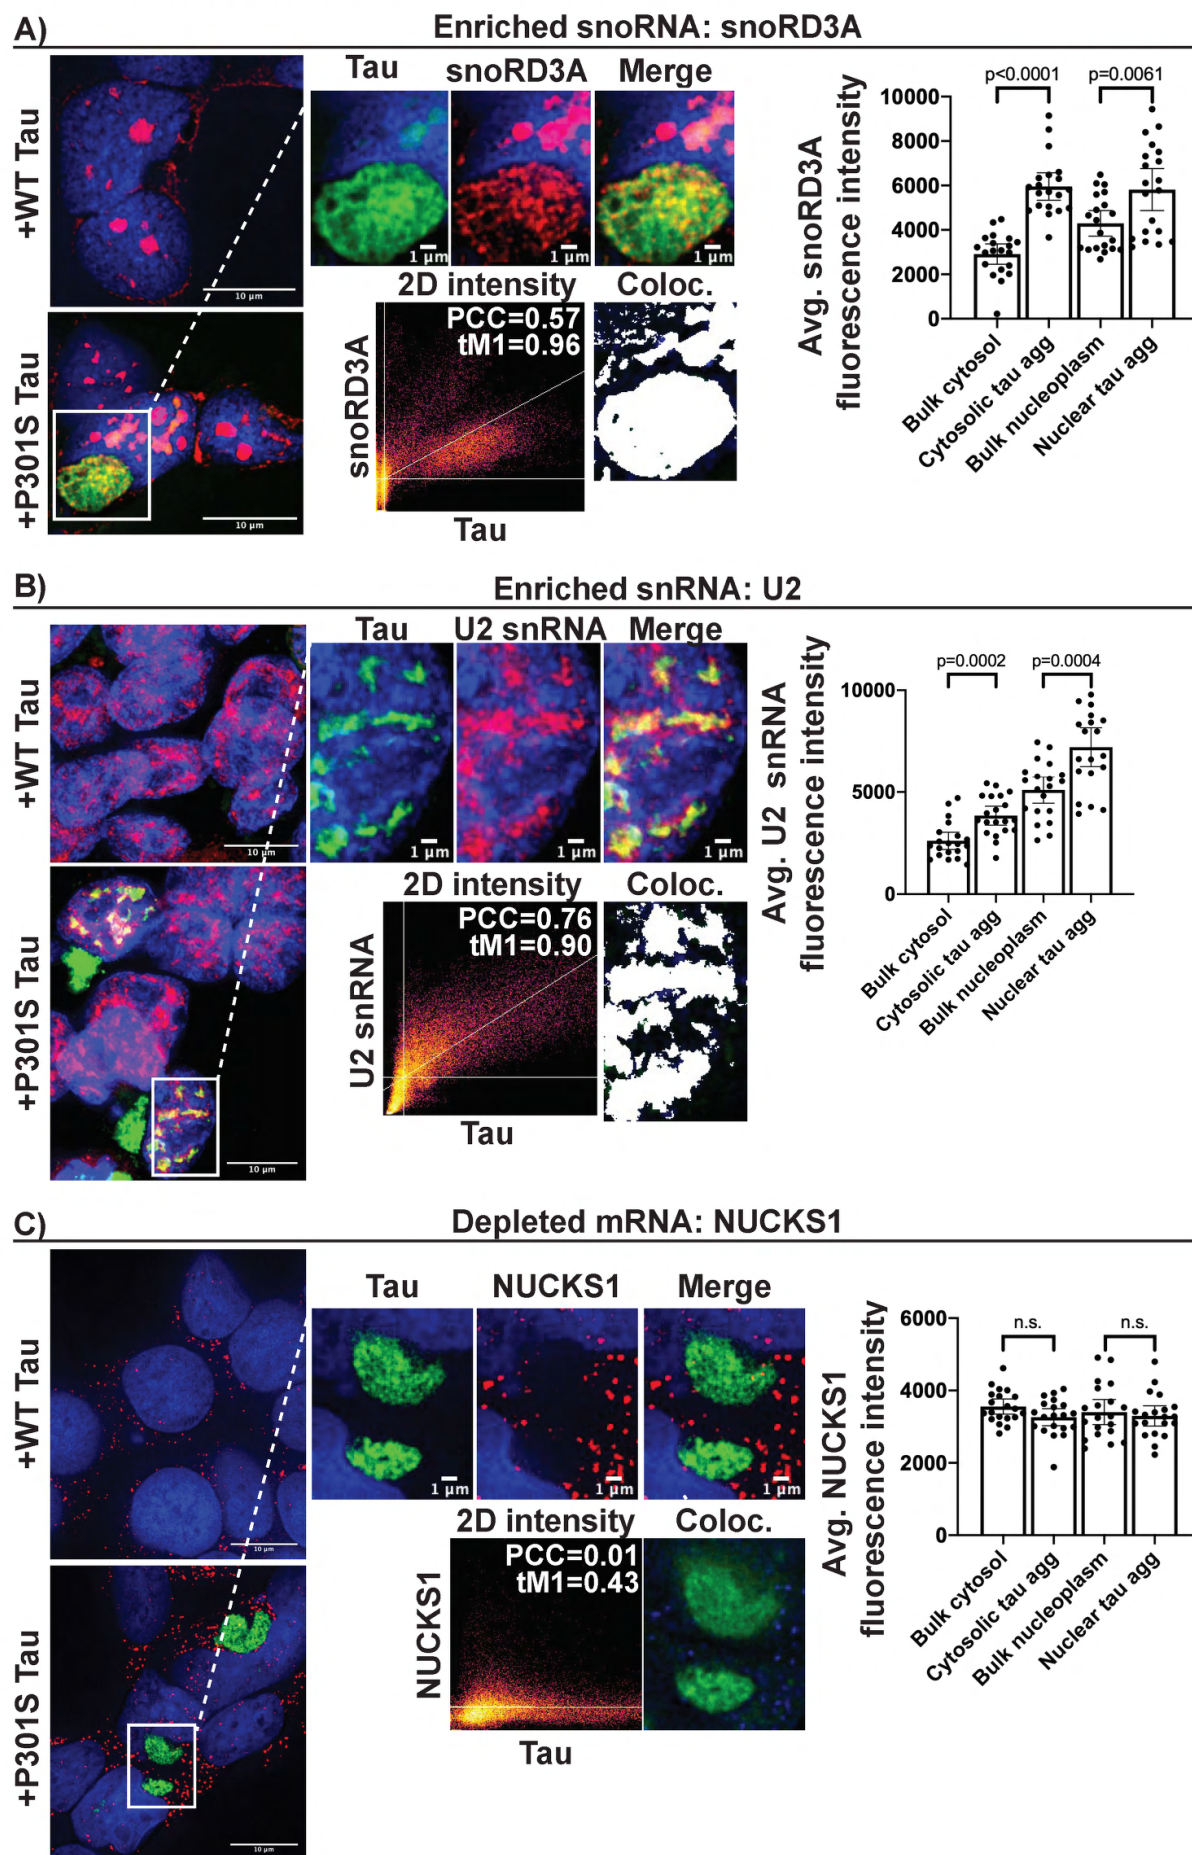

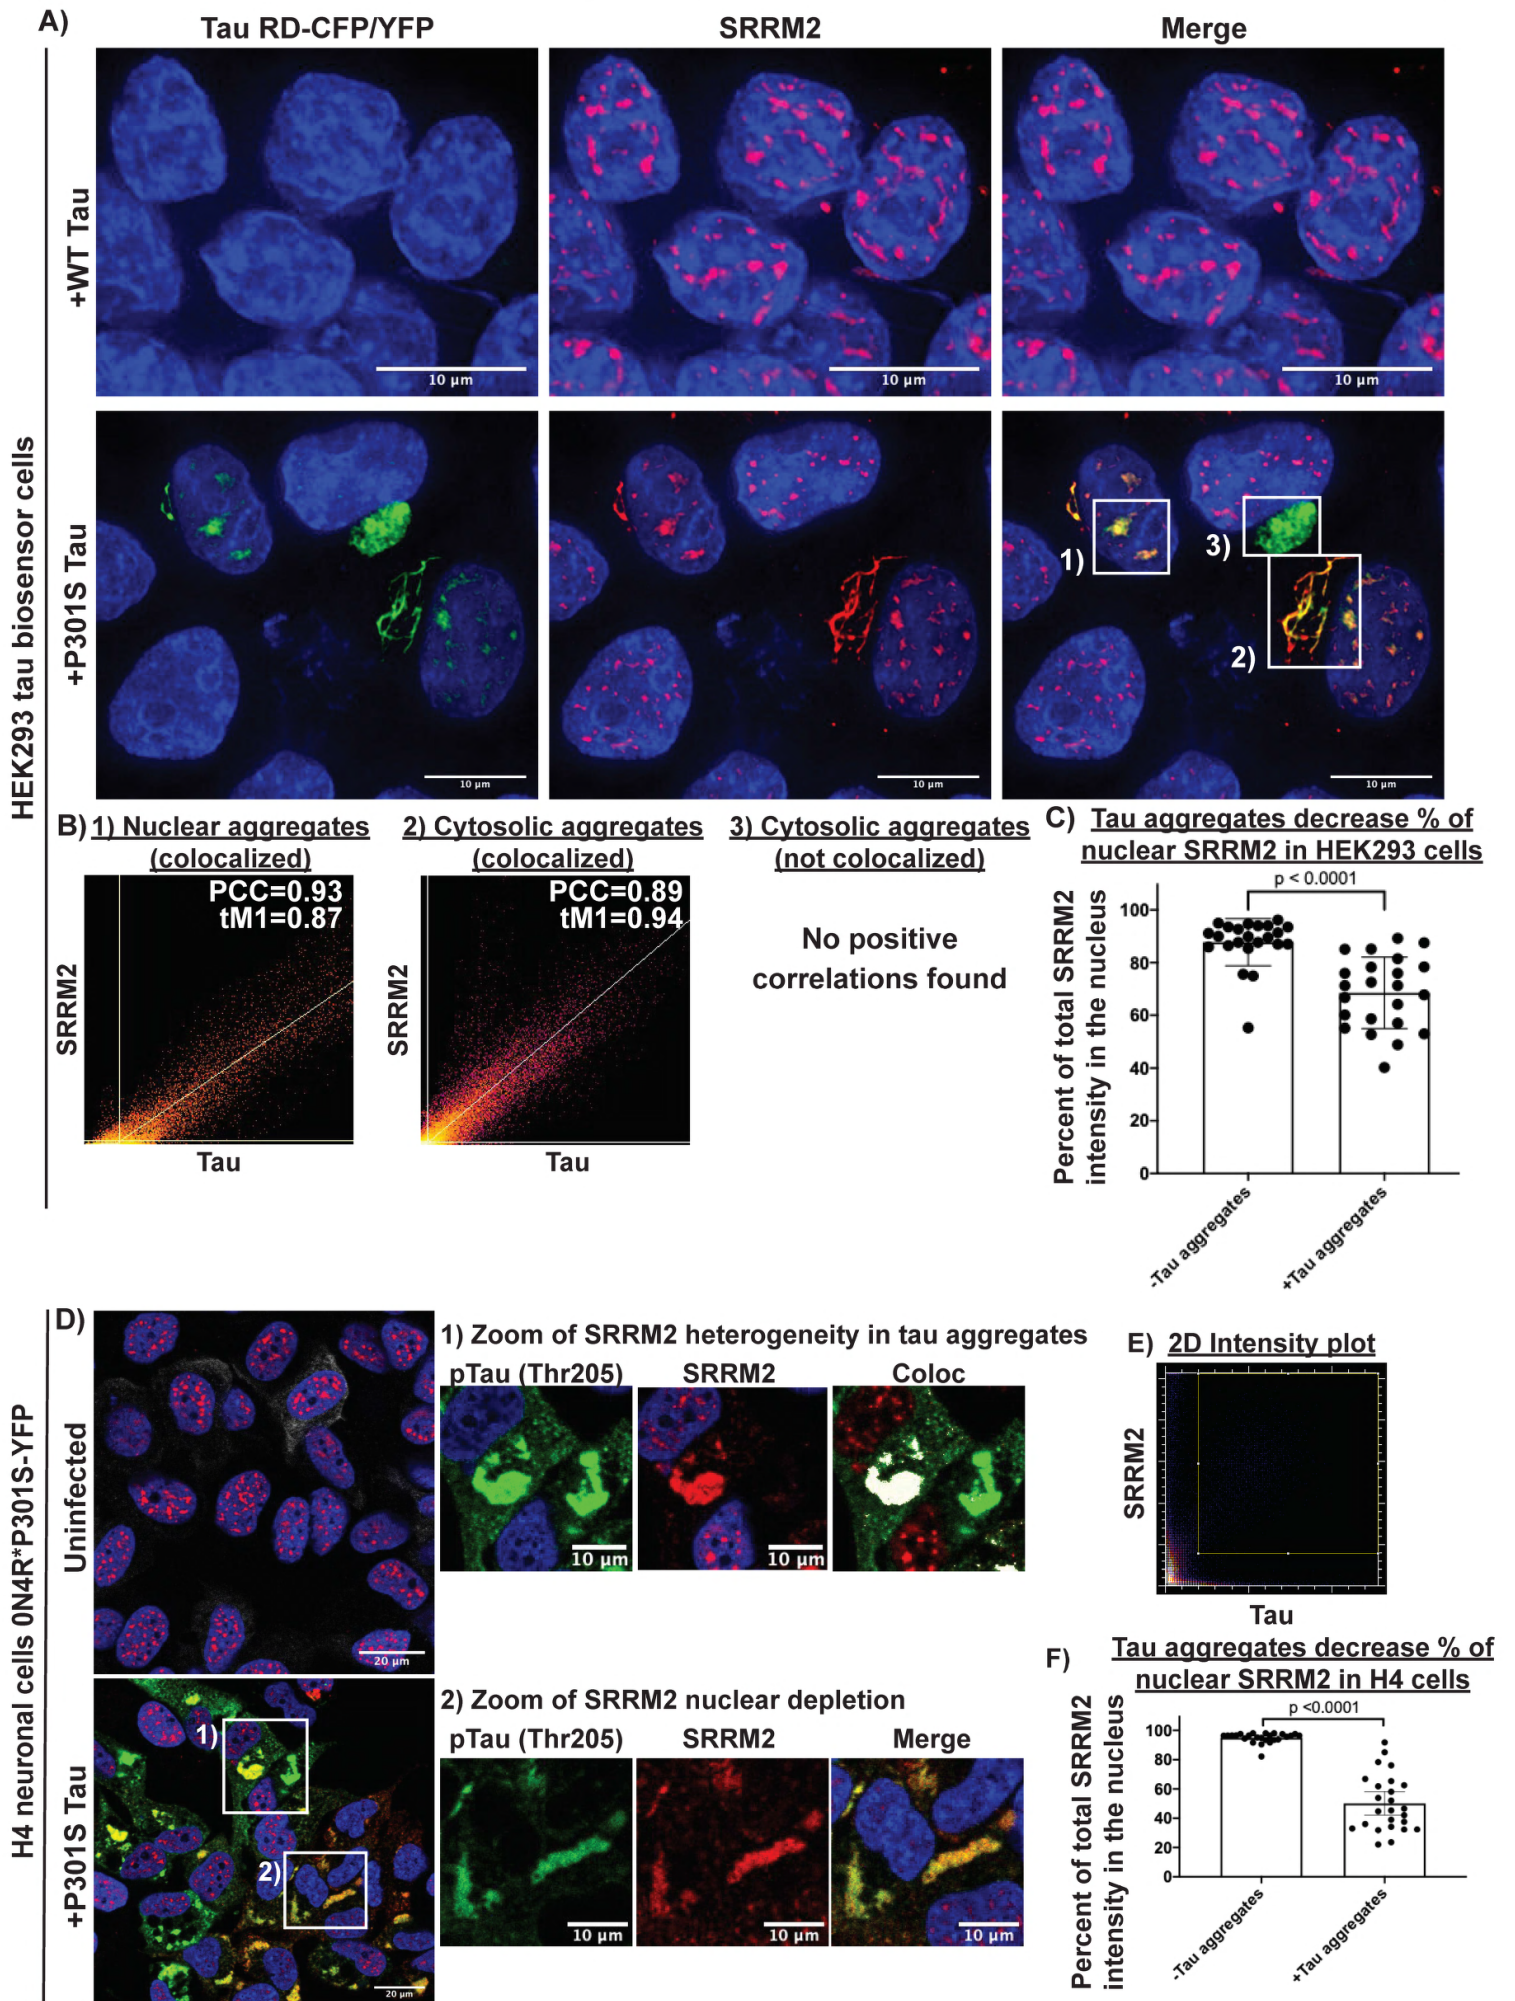

**Figure 5: Other proteins that localize to tau aggregates and the C-terminal region of SRRM2 is responsible for localization to tau aggregates.**

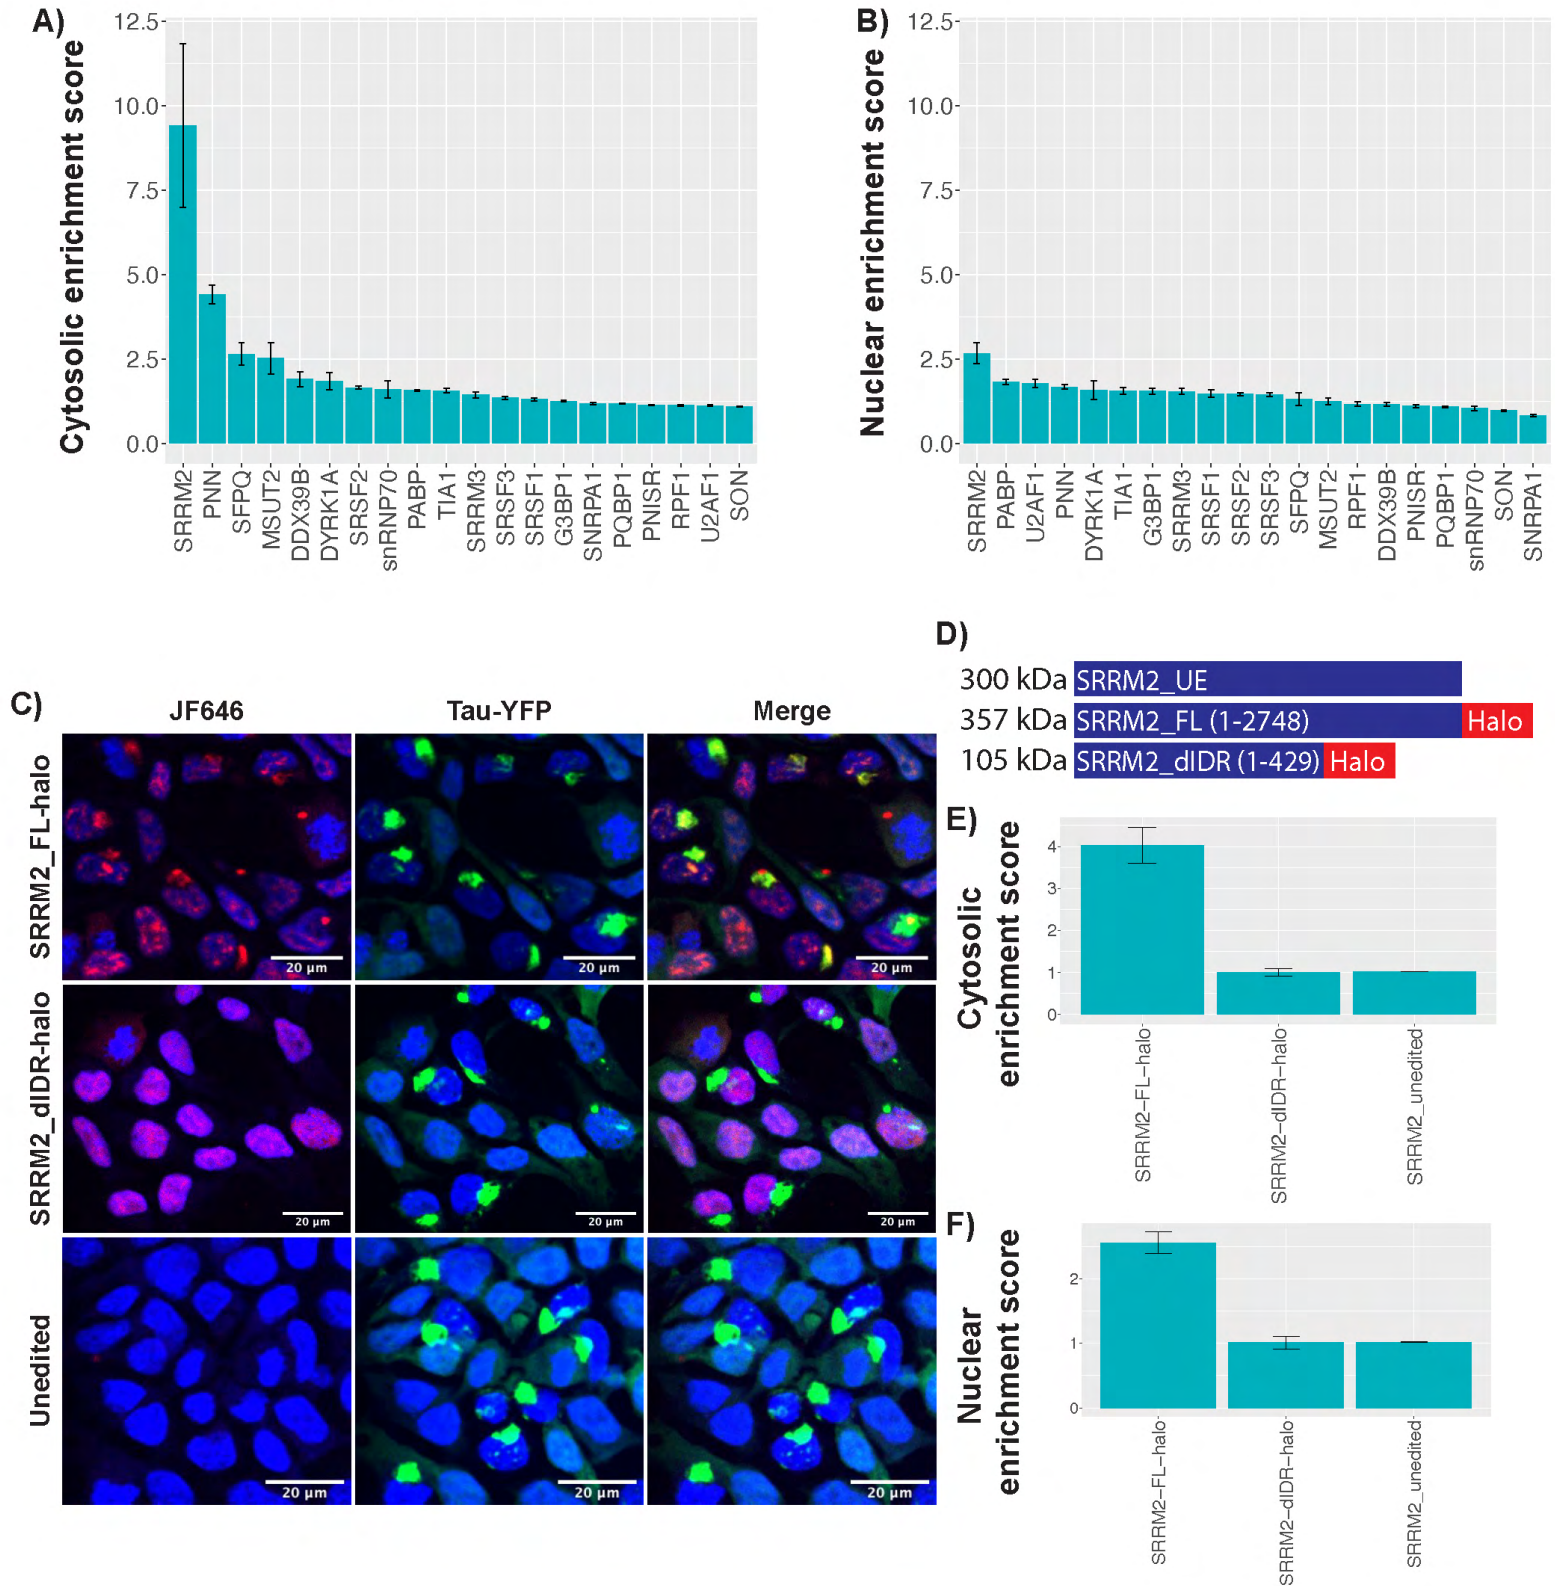

**Figure 6: Tau aggregation alters dynamics and organization of splicing speckles and RNA splicing.**

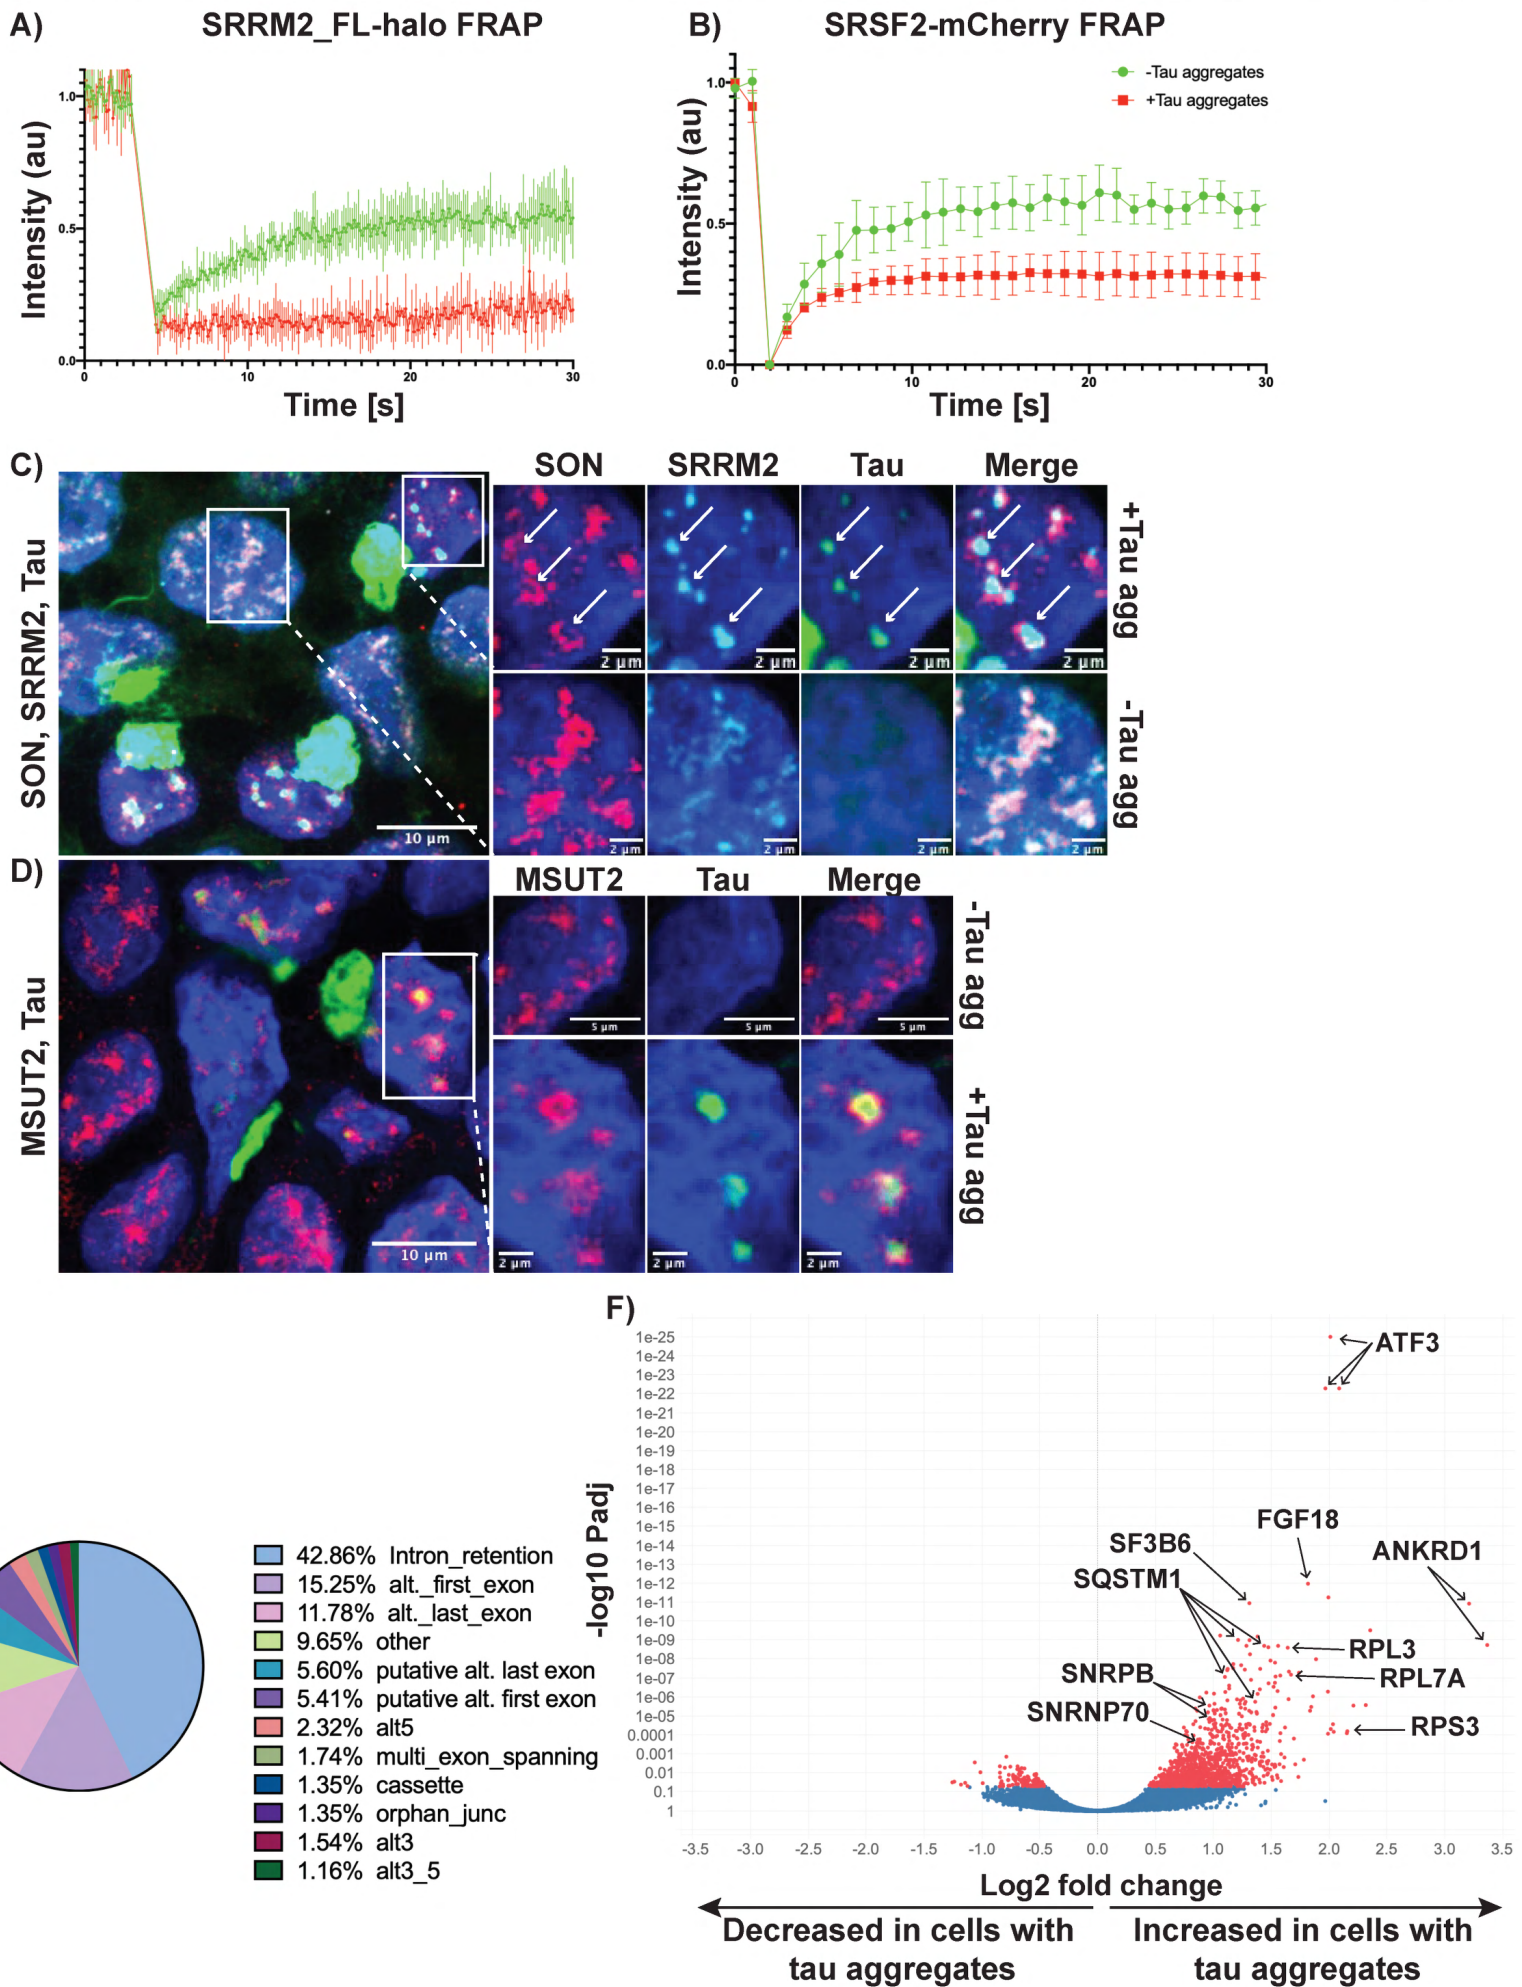



**Figure 7: SRRM2 is relocalized to cytosolic tau aggregates in human tauopathies**

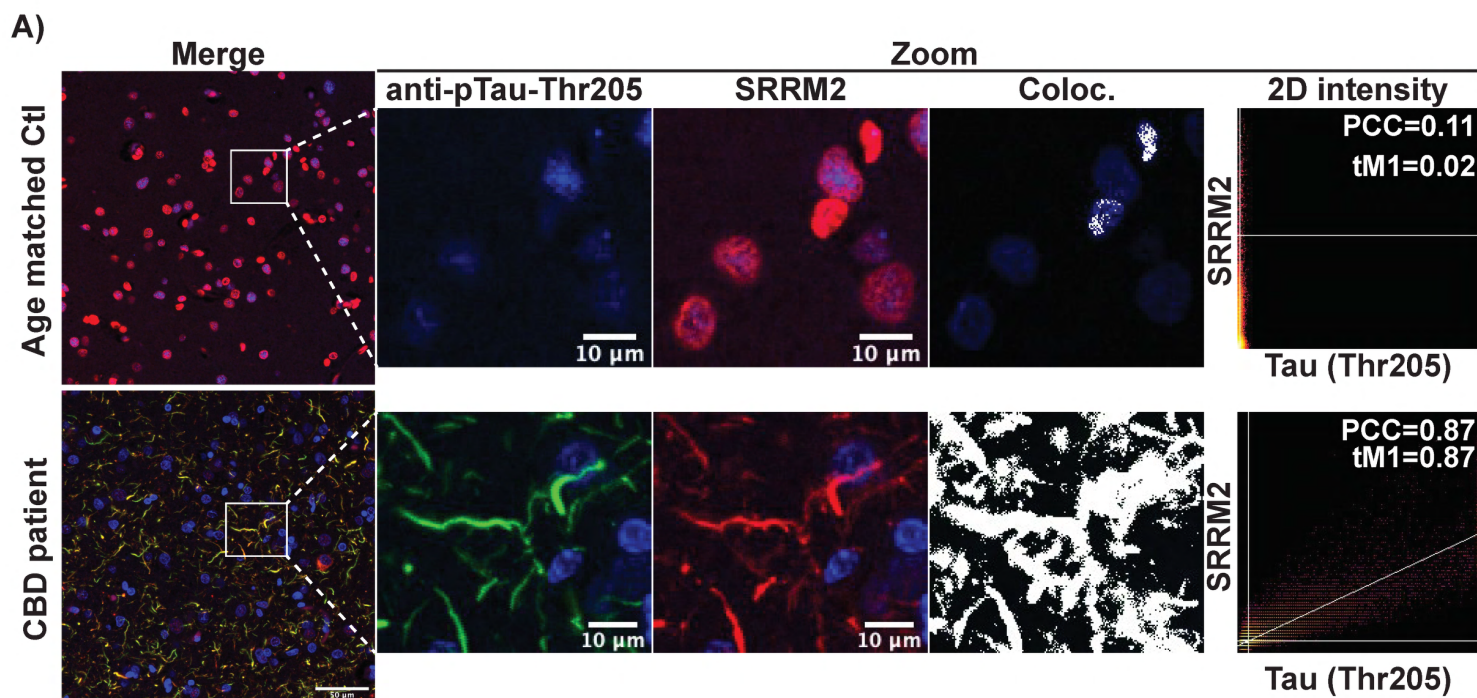

**B) SRRM2 nuclear depletion**

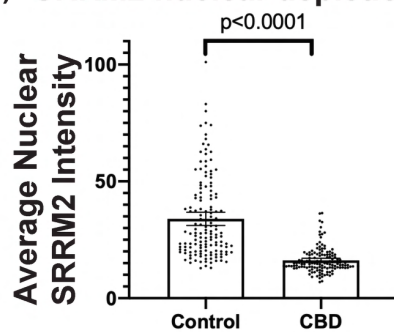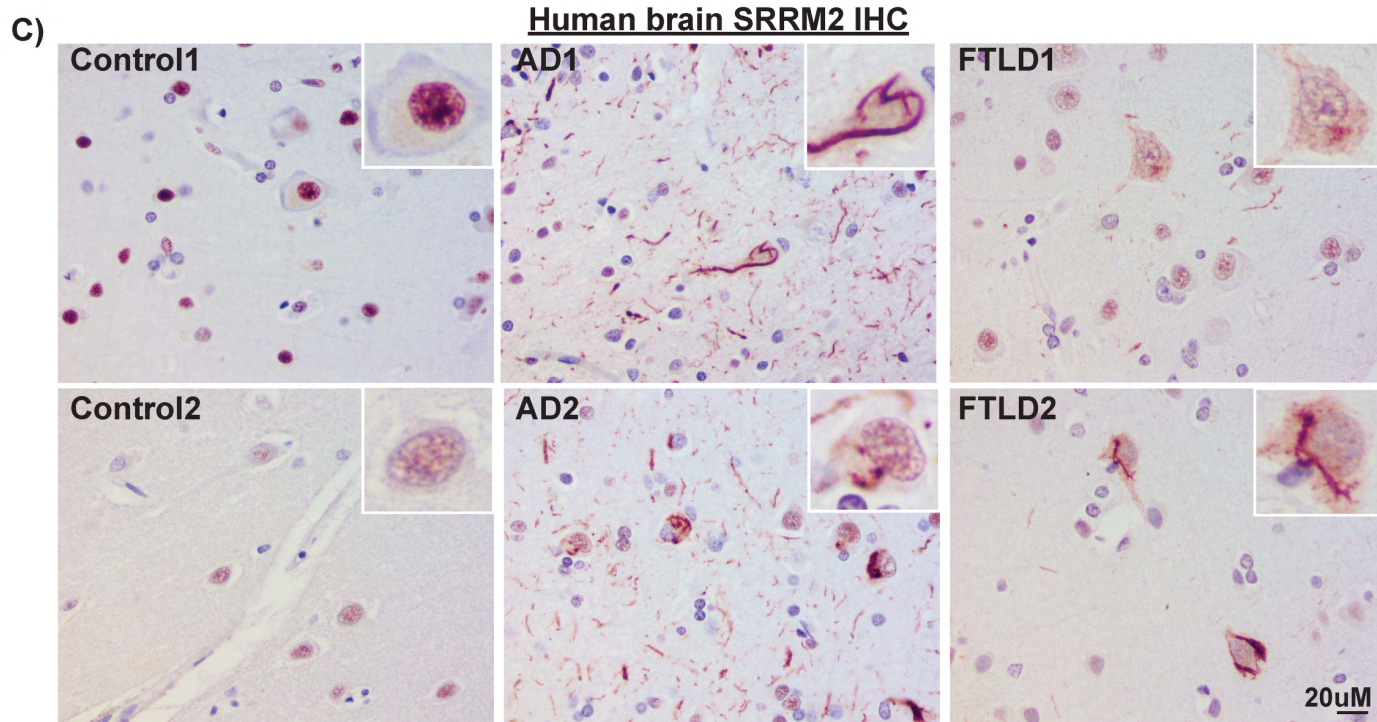

Source: https://www.biorxiv.org/content/biorxiv/early/2021/01/27/2021.01.27.428450.full.pdf
